1 **Hippocampal inputs engage CCK+ interneurons to mediate endocannabinoid-modulated**  
2 **feed-forward inhibition in the prefrontal cortex**

3

4 Xingchen Liu<sup>1</sup>, Jordane Dimidschstein<sup>2</sup>, Gordon Fishell<sup>2,3</sup> and Adam G. Carter<sup>1\*</sup>

5

6 <sup>1</sup> Center for Neural Science, New York University, 4 Washington Place, New York, NY 10003

7 <sup>2</sup> Stanley Center for Psychiatric Research, Broad Institute of Massachusetts Institute of  
8 Technology and Harvard, Boston, MA 02142

9 <sup>3</sup> Department of Neurobiology, Harvard Medical School, Boston, MA 02115

10 \*Corresponding author: [adam.carter@nyu.edu](mailto:adam.carter@nyu.edu)

11

12 Running title: CCK+ interneurons mediate feed-forward inhibition in the PFC

13

14 Abstract: 192

15 Introduction: 758

16 Materials and Methods: 1,361

17 Results: 3,173

18 Discussion: 1,282

19 Number of pages: 38

20 Number of figures: 7 main + 2 supplementary

21

22 **Keywords:**

23

24 **Acknowledgements:** We thank the Carter lab for helpful discussions and comments on the  
25 manuscript. This work was supported by NIH R01 MH085974 (AGC). The authors have no  
26 financial conflicts of interest.

27 **ABSTRACT**

28 Connections from the ventral hippocampus (vHPC) to the prefrontal cortex (PFC) regulate  
29 cognition, emotion and memory. These functions are also tightly regulated by inhibitory networks  
30 in the PFC, whose disruption is thought to contribute to mental health disorders. However,  
31 relatively little is known about how the vHPC engages different populations of interneurons in the  
32 PFC. Here we use slice physiology and optogenetics to study vHPC-evoked feed-forward  
33 inhibition in the mouse PFC. We first show that cholecystokinin (CCK+), parvalbumin (PV+), and  
34 somatostatin (SOM+) interneurons are prominent in layer 5 (L5) of infralimbic PFC. We then show  
35 that vHPC inputs primarily activate CCK+ and PV+ interneurons, with weaker connections onto  
36 SOM+ interneurons. CCK+ interneurons make stronger synapses onto pyramidal tract (PT) cells  
37 over nearby intratelencephalic (IT) cells. However, CCK+ inputs undergo depolarization-induced  
38 suppression of inhibition (DSI) and CB1 receptor modulation only at IT cells. Moreover, vHPC-  
39 evoked feed-forward inhibition undergoes DSI only at IT cells, confirming a central role for CCK+  
40 interneurons. Together, our findings show how vHPC directly engages multiple populations of  
41 inhibitory cells in deep layers of the infralimbic PFC, highlighting unexpected roles for both CCK+  
42 interneurons and endocannabinoid modulation in hippocampal-prefrontal communication.

## 43 INTRODUCTION

44 The prefrontal cortex (PFC) controls cognitive and emotional behaviors (Euston et al., 2012; Miller  
45 and Cohen, 2001) and is disrupted in many neuropsychiatric disorders (Godsil et al., 2013;  
46 Sigurdsson and Duvarci, 2015). PFC activity is driven and maintained by long-range  
47 glutamatergic inputs from a variety of other brain regions (Hoover and Vertes, 2007; Miller and  
48 Cohen, 2001). Strong, unidirectional connections from the ventral hippocampus (vHPC)  
49 contribute to both working memory and threat conditioning in rodents (Jones and Wilson, 2005;  
50 Sotres-Bayon et al., 2012; Spellman et al., 2015). Dysfunction of vHPC to PFC connectivity is  
51 also implicated in schizophrenia, anxiety disorders, chronic stress disorders, and depression  
52 (Godsil et al., 2013; Sigurdsson and Duvarci, 2015). To understand these roles, it is necessary to  
53 establish how vHPC inputs engage local excitatory and inhibitory networks within the PFC.

54  
55 The vHPC primarily projects to the ventral medial PFC in rodents, with axons most prominent in  
56 layer 5 (L5) of infralimbic (IL) PFC (Phillips et al., 2019). These excitatory inputs contact multiple  
57 populations of pyramidal cells, and are much stronger at intratelencephalic (IT) cells than nearby  
58 pyramidal tract (PT) cells (Liu and Carter, 2018). vHPC inputs can drive robust firing of IT cells  
59 (Liu and Carter, 2018), which may be important for maintaining activity during behavioral tasks  
60 (Padilla-Coreano et al., 2016; Spellman et al., 2015). However, they also evoke prominent feed-  
61 forward inhibition at pyramidal cells (Marek et al., 2018), with excitation and inhibition evolving  
62 with different dynamics (Liu and Carter, 2018). Here we focus on the mechanisms responsible for  
63 this inhibition by establishing which interneurons are engaged by vHPC inputs to the PFC.

64  
65 As in other cortices, PFC activity is regulated by a variety of GABAergic interneurons, which have  
66 distinct functions (Abbas et al., 2018; Courtin et al., 2014; Tremblay et al., 2016). Parvalbumin-  
67 expressing (PV+) interneurons mediate feed-forward inhibition via strong synapses at the soma  
68 of pyramidal cells (Atallah et al., 2012; Cruikshank et al., 2007; Gabernet et al., 2005). In contrast,

69 somatostatin-expressing (SOM+) interneurons mediate feed-back inhibition via facilitating  
70 synapses onto the dendrites (Gentet et al., 2012; Silberberg and Markram, 2007). However,  
71 during trains of repetitive activity, SOM+ interneurons can also participate in feed-forward  
72 inhibition (McGarry and Carter, 2016; Tan et al., 2008). Interestingly, recent *in vivo* studies  
73 suggest both PV+ and SOM+ interneurons may contribute to vHPC-evoked inhibition in the PFC  
74 (Abbas et al., 2018; Marek et al., 2018).

75

76 While PV+ and SOM+ interneurons are prominent in the PFC, there is also an unusually high  
77 density of cholecystokinin-expressing (CCK+) interneurons (Whissell et al., 2015). In the  
78 hippocampus, these soma-targeting inhibitory cells help tune the motivation and emotional state  
79 of animals (Armstrong and Soltesz, 2012; Freund, 2003; Freund and Katona, 2007). They also  
80 highly express cannabinoid type 1 (CB1) receptors on their axon terminals (Katona et al., 1999),  
81 and can be strongly modulated by endocannabinoids (Wilson et al., 2001; Wilson and Nicoll,  
82 2001). For example, brief depolarization of postsynaptic pyramidal cells releases  
83 endocannabinoids that bind to CB1 receptors on CCK+ axon terminals and inhibit presynaptic  
84 GABA release, a process known as depolarization-induced suppression of inhibition (DSI) (Wilson  
85 and Nicoll, 2001).

86

87 While CCK+ interneurons are prominent in the PFC and may play a role in different forms of  
88 inhibition, they remain relatively understudied. A major technical reason is low-level expression  
89 of CCK in pyramidal cells (Taniguchi et al., 2011), which makes CCK+ interneurons challenging  
90 to specifically target. For example, expressing Cre-dependent reporters in CCK-Cre transgenics  
91 also label pyramidal cells in the cortex (Taniguchi et al., 2011). Fortunately, this challenge can be  
92 overcome with intersectional viruses using the Dlx enhancer, which restricts expression to  
93 interneurons (Dimidschstein et al., 2016). This approach allows identification of CCK+

94 interneurons, enabling targeted recordings and optogenetic access to study their connectivity and  
95 modulation in the PFC.

96

97 Here we examine vHPC-evoked inhibition at L5 pyramidal cells in IL PFC using slice physiology,  
98 optogenetics and intersectional viral tools. We find vHPC inputs activate PV+, SOM+, and CCK+  
99 interneurons, with different dynamics during repetitive activity. Inputs to PV+ and CCK+  
100 interneurons are strong but depressing, while those onto SOM+ interneurons are weak but  
101 facilitating. CCK+ interneurons contact L5 pyramidal cells, with stronger connections onto PT cells  
102 than neighboring IT cells. However, endocannabinoid modulation via DSI and direct activation of  
103 CB1 receptors only occurs at synapses onto IT cells. Endocannabinoid modulation of vHPC-  
104 evoked feed-forward inhibition also occurs only at IT cells, highlighting a central role for CCK+  
105 interneurons. Together, our findings show how the vHPC engages interneurons to inhibit the PFC,  
106 while revealing a novel property of cell-type specific endocannabinoid modulation in this circuit.

107

108 **MATERIALS AND METHODS**

109

110 **Animals:** Experiments used wild-type and transgenic mice of either sex in a C57BL/6J  
111 background (all breeders from Jackson Labs). Homozygote male breeders (PV-Cre = JAX  
112 008069, SOM-Cre = JAX 013044, CCK-Cre = JAX 012706) were paired with female wild-type or  
113 Ai14 breeders (JAX 007914) to yield heterozygote offspring for experiments. All experimental  
114 procedures were approved by the University Animal Welfare Committee of New York University.

115

116 **Viruses:** AAV viruses used in this study were: AAV1.EF1a.DIO.hChR2(H134R)-  
117 eYFP.WPRE.hGH (UPenn AV-1-20298P), AAV1.hysn.hChR2(H134R)-eYFP.WPRE.hGH  
118 (UPenn AV-26973P), AAV1.EF1a.DIO.eYFP.WPRE.hGH (Upenn AV-1-27056),  
119 AAVrg.CAG.GFP (Addgene 37825-AAVrg), AAVrg.CAG.tdTomato (Addgene 59462-AAVrg).  
120 Additional viral constructs were assembled for Cre-dependent expression of a reporter under the  
121 control of the Dlx5/6 enhancer: AAV-Dlx-Flex-GFP (Addgene #83900) and AAV-Dlx-Flex-ChR2-  
122 mCherry (Dimidschstein et al., 2016). These constructs take advantage of the double-floxed  
123 inverted system, in which two consecutive and incompatible lox-sites are placed both in 5' and 3'  
124 of the reversed coding sequences of the viral reporter, restricting expression to interneurons.

125

126 **Stereotaxic injections:** Mice aged 4-6 weeks were deeply anesthetized with either isoflurane or  
127 a mixture of ketamine and xylazine, then head-fixed in a stereotaxic (Kopf Instruments). A small  
128 craniotomy was made over the injection site, using these coordinates relative to Bregma: PFC =  
129  $\pm 0.4$ ,  $-2.3$ ,  $+2.1$  mm, PAG =  $-0.6$ , both  $-2.5$  and  $-3$ ,  $-4.0$  mm, vHPC =  $-3.3$ , both  $-3.6$  and  $-4.2$ , -  
130 3 mm (mediolateral, dorsoventral, and rostrocaudal axes). For retrograde labeling, pipettes were  
131 filled with red retrogradely transported fluorescent beads (Lumafuor), Cholera Toxin Subunit B  
132 (CTB) conjugated to Alexa 647 (Life Technologies), or viruses. Borosilicate pipettes with 5 to  
133 10  $\mu$ m diameter tips were back-filled with dye and/or virus, and a volume of 130-550 nl was

134 pressure-injected using a Nanoject III (Drummond) every 30 s. The pipette was left in place for  
135 an additional 5 min, allowing time to diffuse away from the pipette tip, before being slowly retracted  
136 from the brain. For both retrograde and viral labeling, animals were housed for 2-3 weeks before  
137 slicing.

138

139 **Histology and fluorescence microscopy:** Mice were anesthetized with a lethal dose of  
140 ketamine and xylazine, then perfused intracardially with 0.01 M phosphate buffered saline (PBS)  
141 followed by 4% paraformaldehyde (PFA) in 0.01 M PBS. Brains were fixed in 4% PFA in 0.01 M  
142 PBS overnight at 4°C. Slices were prepared at a thickness of 70 µm for imaging intrinsic  
143 fluorescence or 40 µm for antibody staining (Leica VT 1000S vibratome). For  
144 immunohistochemistry, slices were incubated with blocking solution (1% bovine serum albumin  
145 and 0.2% Triton-X in 0.01 m PBS) for 1 hour at room temperature before primary antibodies were  
146 applied in blocking solution [mouse anti-parvalbumin antibody (Millipore, MAB1572) at 1:2000  
147 overnight, rat anti-somatostatin (Millipore, MAB354) at 1:200 overnight, guinea pig anti-CB1R  
148 (Frontier Institute, Af530) at 1:500 for 36 hours] at 4 °C. Slices were then incubated with secondary  
149 antibodies in blocking solution [goat anti-mouse 647 at 1:200, goat anti-rat 647 at 1:200, goat anti-  
150 guinea pig 647 at 1:500 (Invitrogen)] for 1.5 h at room temperature before mounted under glass  
151 coverslips on gelatin-coated slides using ProLong Gold antifade reagent with DAPI (Invitrogen).  
152 Images were acquired using a confocal microscope (Leica SP8). Image processing involved  
153 adjusting brightness, contrast, and manual cell counting using ImageJ (NIH).

154

155 **Slice preparation:** Mice aged 6-8 weeks were anesthetized with a lethal dose of ketamine and  
156 xylazine, and perfused intracardially with ice-cold external solution containing the following  
157 (in mM): 65 sucrose, 76 NaCl, 25 NaHCO<sub>3</sub>, 1.4 NaH<sub>2</sub>PO<sub>4</sub>, 25 glucose, 2.5 KCl, 7 MgCl<sub>2</sub>, 0.4 Na-  
158 ascorbate, and 2 Na-pyruvate (295–305 mOsm), and bubbled with 95% O<sub>2</sub>/5% CO<sub>2</sub>. Coronal  
159 slices (300 µm thick) were cut on a VS1200 vibratome (Leica) in ice-cold external solution, before

160 being transferred to ACSF containing (in mM): 120 NaCl, 25 NaHCO<sub>3</sub>, 1.4 NaH<sub>2</sub>PO<sub>4</sub>, 21 glucose,  
161 2.5 KCl, 2 CaCl<sub>2</sub>, 1 MgCl<sub>2</sub>, 0.4 Na-ascorbate, and 2 Na-pyruvate (295–305 mOsm), bubbled with  
162 95% O<sub>2</sub>/5% CO<sub>2</sub>. Slices were kept for 30 min at 35°C, before being allowed to recover for 30 min  
163 at room temperature before starting recordings. All recordings were conducted at 30–32°C.

164

165 **Electrophysiology:** Whole-cell recordings were obtained from pyramidal neurons or  
166 interneurons located in layer 5 (L5) of infralimbic (IL) PFC. Neurons were identified by infrared-  
167 differential interference contrast or fluorescence, as previously described (Chalifoux and Carter,  
168 2010). In the case of pyramidal cells, projection target was established by the presence of  
169 retrobeads or Alexa-conjugated CTB, as previously described (Little and Carter, 2013). Pairs of  
170 adjacent cells were chosen for sequential recording, ensuring they received similar inputs  
171 (typically < 50 μm between cells). Borosilicate pipettes (2–5 MΩ) were filled with internal solutions.  
172 Three types of recording internal solutions were used. For current-clamp recordings (in mM): 135  
173 K-gluconate, 7 KCl, 10 HEPES, 10 Na-phosphocreatine, 4 Mg<sub>2</sub>-ATP, and 0.4 Na-GTP, 290–295  
174 mOsm, pH 7.3, with KOH. For voltage-clamp recordings (in mM): 135 Cs-gluconate, 10 HEPES,  
175 10 Na-phosphocreatine, 4 Mg<sub>2</sub>-ATP, and 0.4 Na-GTP, 0.5 EGTA, 10 TEA-chloride, and 2 QX314,  
176 290–295 mOsm, pH 7.3, with CsOH. For DSI experiments (in mM): 130 K-gluconate, 1.5 MgCl<sub>2</sub>,  
177 10 HEPES, 1.1 EGTA, 10 phosphocreatine, 2 MgATP, 0.4 NaGTP. In some experiments studying  
178 cellular morphology, 5% biocytin was also included in the recording internal solution. After  
179 allowing biocytin to diffuse through the recorded cell for at least 30 minutes, slices were fixed with  
180 4% PFA before staining with streptavidin conjugated to Alexa 647 (Invitrogen).

181

182 Electrophysiology recordings were made with a Multiclamp 700B amplifier (Axon Instruments),  
183 filtered at 4 kHz for current-clamp and 2 kHz for voltage-clamp, and sampled at 10 kHz. The initial  
184 series resistance was <20 MΩ, and recordings were ended if series resistance rose above 25 MΩ.  
185 In some experiments, 1 μM TTX was added to block APs, along with 100 μM 4-AP and 4 mM



186 external  $\text{Ca}^{2+}$  to restore presynaptic release. In many experiments, 10  $\mu\text{M}$  CPP was used to block  
187 NMDA receptors. In current-clamp experiments characterizing intrinsic properties, 10  $\mu\text{M}$  NBQX,  
188 10  $\mu\text{M}$  CPP and 10  $\mu\text{M}$  gabazine were used to block excitation and inhibition. In some  
189 experiments, 10  $\mu\text{M}$  AM-251 was used to block CB1 receptors or 1  $\mu\text{M}$  WIN 55,212-2 was used  
190 to activate CB1 receptors. All chemicals were purchased from either Sigma or Tocris Bioscience.

191  
192 **Optogenetics:** Channelrhodopsin-2 (ChR2) was expressed in presynaptic neurons and activated  
193 with a brief light pulse from a blue LED (473 nm) (Thorlabs). For wide-field illumination, light was  
194 delivered via a 10x 0.3NA objective (Olympus) centered on the recorded cell. LED power was  
195 routinely calibrated at the back aperture of the objective. LED power and duration were adjusted  
196 to obtain reliable responses, with typical values of 0.4 to 10 mW and 2 ms, respectively.

197  
198 **Data analysis:** Electrophysiology and imaging data were acquired using National Instruments  
199 boards and custom software in MATLAB (MathWorks). Off-line analysis was performed using Igor  
200 Pro (WaveMetrics). Intrinsic properties were determined as follows. Input resistance was  
201 calculated from the steady-state voltage during a  $-50$  pA, 500 ms current step. Voltage sag ratio  
202 was calculated as  $(V_{\text{sag}} - V_{\text{ss}}) / (V_{\text{sag}} - V_{\text{baseline}})$ , where  $V_{\text{sag}}$  is average over a 1 ms window around  
203 the minimum,  $V_{\text{ss}}$  is average of last 50 ms, and  $V_{\text{baseline}}$  is average of 50 ms preceding the current  
204 injection. The membrane time constant ( $\tau$ ) was measured using exponential fits to these  
205 hyperpolarizations. Adaptation was calculated as the ratio of the first and last inter-spike intervals,  
206 such that a value of 1 indicates no adaptation and values  $<1$  indicate lengthening of the inter-  
207 spike interval. For experiments with a single optogenetic stimulation, the PSC amplitude was  
208 measured as the average value across 1 ms around the peak subtracted by the average 100 ms  
209 baseline value prior to the stimulation. For experiments with a train of optogenetic stimulation,  
210 each PSC amplitude was measured as the average value in a 1 ms window around the peak,  
211 minus the average 2 ms baseline value before each stimulation. Most summary data are reported

212 in the text and figures as arithmetic mean  $\pm$  SEM. Ratios of responses at pairs of cells are reported  
213 as geometric mean in the text, and with  $\pm$  95% confidence interval (CI) in the figures, unless  
214 otherwise noted. Comparisons between unpaired data were performed using non-parametric  
215 Mann-Whitney test. Comparisons between data recorded in pairs were performed using non-  
216 parametric Wilcoxon test. Two-tailed p values  $<0.05$  were considered significant.  
217

218 **RESULTS**

219

220 **vHPC-evoked inhibition and interneurons in L5 of infralimbic PFC**

221 We studied vHPC-evoked inhibition at pyramidal neurons using whole-cell recordings and  
222 optogenetics in acute slices of the mouse PFC. To allow for visualization and activation of inputs  
223 to the PFC, we injected Chr2-expressing virus (AAV-ChR2-EYFP) into the ipsilateral vHPC  
224 (**Fig. 1A**) (Little and Carter, 2012). In the same animals, we labeled IT cells by co-injecting  
225 retrogradely transported, fluorescently-tagged cholera toxin subunit B (CTB) into the contralateral  
226 PFC (cPFC) (**Fig. 1A**) (Anastasiades et al., 2018). After 2-3 weeks of expression, we prepared  
227 *ex vivo* slices of the medial PFC, observing vHPC axons and IT cells in L5 of IL PFC (**Fig. 1B**)  
228 (Liu and Carter, 2018). We then recorded in voltage-clamp from IT cells and activated vHPC  
229 inputs using wide-field illumination (5 pulses at 20 Hz, 2 ms pulse duration). Trains of vHPC inputs  
230 evoked excitatory postsynaptic currents (EPSCs) at -65 mV and inhibitory postsynaptic currents  
231 (IPSCs) at +15 mV (**Fig. 1C**; EPSC<sub>1</sub> = 386 ± 49 pA, IPSC<sub>1</sub> = 961 ± 207 pA, E/I = 0.50 ± 0.08; n =  
232 7 cells, 3 animals). These findings indicate that vHPC inputs drive robust feed-forward inhibition  
233 in deep layers of the IL PFC, motivating us to identify which interneurons are responsible.

234

235 In principle, feed-forward inhibition could be mediated by a variety of interneurons, including PV+  
236 and SOM+ interneurons (Abbas et al., 2018; Anastasiades et al., 2018; Marek et al., 2018;  
237 McGarry and Carter, 2016). To visualize these cells in the PFC, we crossed PV-Cre and SOM-  
238 Cre mice with reporter mice (Ai14) that express Cre-dependent tdTomato (Hippenmeyer et al.,  
239 2005; Madisen et al., 2010; Taniguchi et al., 2011). We observed labeling of PV+ and SOM+  
240 interneurons in L5 of IL PFC, suggesting they could be contacted by vHPC afferents (**Fig. 1D**).  
241 However, the PFC also has a high density of cholecystokinin-expressing (CCK+) interneurons  
242 (Whissell et al., 2015), which mediate inhibition in other cortices and the hippocampus (Armstrong  
243 and Soltesz, 2012; Freund and Katona, 2007), and could also participate in the PFC. To label

244 these cells, we initially injected AAV-DIO-GFP into CCK-Cre mice but observed labeling of both  
245 interneurons and pyramidal neurons across multiple layers (**Fig. 1E**). To restrict labeling to CCK+  
246 interneurons, we instead used AAV-Dlx-Flex-GFP, expressing Cre-dependent GFP under control  
247 of the Dlx enhancer (Dimidschstein et al., 2016). Injecting AAV-Dlx-Flex-GFP selectively labeled  
248 CCK+ interneurons in the IL PFC, including prominent labeling in L5 (**Fig. 1E**). Importantly, we  
249 found little co-labeling of CCK+ cells with either PV (**Fig. 1F & S1A**; 11.3 % overlap, n = 308 cells  
250 total, 17 slices, 6 animals) or SOM (6.6% overlap, n = 105 cells total, 8 slices, 3 animals).

251  
252 To confirm targeting of CCK+ interneurons, we next used whole-cell recordings followed by post-  
253 hoc reconstructions (**Fig. 1G**). We found both axons and dendrites in L5 of IL PFC, and intrinsic  
254 properties similar to reports in other parts of the brain (**Fig. S1B**;  $R_{in} = 130 \pm 13 \text{ M}\Omega$ ,  $V_m = -68 \pm$   
255  $1 \text{ mV}$ ,  $\text{Sag} = 4.1 \pm 1.0 \%$ ,  $\text{Adaptation} = 0.81 \pm 0.04$ ,  $\text{Tau} = 9.1 \pm 0.6 \text{ ms}$ ; n = 12 cells, 4 animals)  
256 (Daw et al., 2009). CCK+ interneurons are also distinguished from PV+ cells by enrichment of the  
257 cannabinoid type 1 receptor (CB1R) on presynaptic terminals (Bodor et al., 2005; Dudok et al.,  
258 2015; Katona et al., 1999). To examine expression in the IL PFC, we used immunocytochemistry  
259 and detected CB1R+ puncta located at either PV+ or CCK+ axons (**Fig. 1H**). We found CB1R+  
260 puncta showed higher co-localization with CCK+ axons (based on GFP+ expression) than with  
261 PV+ axons (**Fig. 1H**, puncta density in  $10^3/\mu\text{m}^2$ :  $\text{PV+CB1R+} = 3.79 \pm 0.64$ ,  $\text{GFP+CB1R+} = 11.27$   
262  $\pm 1.5$ ,  $p = 0.0003$ ). These results confirm our viral strategy can identify CCK+ interneurons, which  
263 are present in deep layers of IL. Moreover, they suggest PV+, SOM+, and CCK+ interneurons  
264 are positioned to receive vHPC inputs and may mediate feed-forward inhibition.

265

### 266 **vHPC inputs primarily engage PV+ and CCK+ interneurons**

267 Previous studies have suggested that vHPC inputs engage PV+ and SOM+ interneurons in the  
268 PFC (Abbas et al., 2018; Marek et al., 2018). However, these connections have not been

269 examined in L5 of IL, where vHPC connections are strongest (Liu and Carter, 2018). Moreover,  
270 little is known about the activation of CCK+ interneurons, which may play distinct functional roles  
271 (Armstrong and Soltesz, 2012; Freund and Katona, 2007). To study connectivity, we injected  
272 AAV-ChR2-YFP into the vHPC and recorded EPSCs from identified interneurons. To compare  
273 across animals and cell types, we recorded from neighboring IT cells within the same slice, which  
274 receive the bulk of vHPC inputs (Liu and Carter, 2018). To isolate monosynaptic connections, we  
275 included TTX (1  $\mu$ M), 4-AP (10  $\mu$ M), and elevated  $Ca^{2+}$  (4 mM), which blocks action potentials  
276 (APs) but restores presynaptic release (Little and Carter, 2012; Petreanu et al., 2009). We also  
277 kept the light intensity and duration constant within pairs, allowing us to account for differences in  
278 viral expression across animals and slices (Liu and Carter, 2018). We found that vHPC inputs  
279 evoked robust EPSCs at CCK+ interneurons, which were similar in amplitude to IT cells (**Fig. 2A**;  
280 IT =  $674 \pm 102$  pA, CCK+ =  $413 \pm 89$  pA, CCK+/IT ratio = 0.56,  $p = 0.13$ ;  $n = 9$  pairs, 4 animals).  
281 We also found prominent vHPC-evoked EPSCs at PV+ interneurons, with comparable amplitudes  
282 at IT cells (**Fig. 2B**; IT =  $569 \pm 91$  pA, PV+ =  $555 \pm 83$  pA, PV+/IT ratio = 0.94,  $p = 0.82$ ;  $n = 9$   
283 pairs, 4 animals). In contrast, vHPC inputs evoked much smaller EPSCs at SOM+ interneurons  
284 compared to IT cells (**Fig. 2C**; IT =  $421 \pm 69$  pA, SOM+ =  $95 \pm 33$  pA, SOM+/IT ratio = 0.17,  $p =$   
285 0.004;  $n = 9$  pairs, 4 animals). These findings show that all three cell types receive direct vHPC  
286 inputs, with greater responses at CCK+ and PV+ interneurons.

287  
288 Having established the targeting of vHPC inputs, we next assessed their ability to drive action  
289 potentials (APs) at the three classes of interneurons. We used similar viral and labeling  
290 approaches, but in this case conducted current-clamp recordings in the absence of TTX and 4-AP.  
291 We also kept light intensity constant within each set of experiments, making sure we evoked  
292 action potentials in at least one of the recorded pair of cells. We found that single vHPC inputs  
293 evoked APs in pairs of CCK+ and IT cells, but the interneurons showed higher probability of firing

294 **(Fig. 2D; AP probability: IT =  $0.32 \pm 0.15$ , CCK+ =  $0.84 \pm 0.11$ ,  $p = 0.03$ ; n = 9 pairs, 4 animals).**  
295 Similarly, we observed that vHPC inputs also preferentially activate PV+ over IT cells **(Fig. 2E;**  
296 **AP probability: IT =  $0.06 \pm 0.06$ , PV+ =  $0.65 \pm 0.17$ ,  $p = 0.04$ ; n = 8 pairs, 4 animals).** In contrast,  
297 SOM+ interneurons remained unresponsive to vHPC inputs, even when using higher light  
298 intensities that were able to activate IT cells **(Fig. 2F; AP probability: IT =  $0.81 \pm 0.12$ , SOM+ =**  
299  **$0.13 \pm 0.06$ ,  $p = 0.01$ ; n = 7 pairs, 3 animals).** These results established a hierarchy for activation,  
300 suggesting CCK+ interneurons are engaged by vHPC inputs and mediate feed-forward inhibition.

301

### 302 **Short-term dynamics differ between populations of interneurons**

303 Repetitive activity at vHPC to PFC connections is functionally important and depends on stimulus  
304 frequency (Liu and Carter, 2018; Siapas et al., 2005). At the synaptic level, repetitive activity  
305 engages short-term plasticity to change the strength of individual connections (Zucker and  
306 Regehr, 2002). We next examined the response to repetitive vHPC inputs by stimulating with brief  
307 trains (5 pulses at 20Hz) in the absence of TTX and 4-AP (Liu and Carter, 2018; McGarry and  
308 Carter, 2016). We observed that EPSCs at CCK+ and PV+ interneurons strongly depress over  
309 the course of stimulus trains **(Fig. 3A, B & D; EPSC<sub>2</sub> / EPSC<sub>1</sub>: CCK+ =  $0.82 \pm 0.06$ ; n = 6 cells, 3**  
310 **animals; PV+ =  $0.88 \pm 0.06$ ; n = 7 cells, 3 animals).** In contrast, the EPSCs at SOM+ interneurons  
311 initially facilitated during trains **(Fig. 3C & D; EPSC<sub>2</sub> / EPSC<sub>1</sub> =  $1.78 \pm 0.23$ ; n = 8 cells, 3 animals).**  
312 These results indicate the vHPC engages all three cell types, with connections at PV+ and CCK+  
313 interneurons strong but depressing, and those at SOM+ interneurons weak but facilitating.

314

315 The short-term dynamics of vHPC inputs suggested differential engagement of PV+, SOM+, and  
316 CCK+ interneurons during repetitive activity. We observed that stimulus trains of vHPC inputs  
317 generated decreasing AP probabilities at CCK+ and PV+ interneurons **(Fig. 3E, F & H; stimulus**  
318 **1 & 2 AP probabilities: CCK+ =  $0.97 \pm 0.02$  &  $0.75 \pm 0.06$ ; n = 12 cells, 5 animals; PV+ =  $0.96 \pm$**

319 0.02 &  $0.70 \pm 0.13$ ; n = 6 cells, 3 animals;). In contrast, although SOM+ interneurons did not fire  
320 with single vHPC inputs, they were activated during trains. Importantly, these responses were not  
321 due to recurrent network activity, as stimulation intensity was chosen here to ensure that IT cells  
322 remained quiescent (**Fig. 3G & H**; stimulus 1 & 2 AP probabilities: IT = 0 & 0, SOM+ = 0 &  $0.57$   
323  $\pm 0.14$ ; n = 6 pairs, 4 animals). These findings suggest the vHPC differentially engages three  
324 interneurons with distinct dynamics during repetitive activity, with strong and depressing PV+ and  
325 CCK+ activity contributing early, and weaker but facilitating SOM+ activity contributing later.

326

### 327 **CCK+ interneurons make connections onto L5 pyramidal cells**

328 Our results indicate that vHPC inputs strongly engage CCK+ interneurons in the PFC, suggesting  
329 a role in feed-forward inhibition. However, the connections made by CCK+ interneurons onto  
330 nearby pyramidal cells are not well established in the cortex. To study CCK+ output, we developed  
331 a new virus (AAV-Dlx-Flex-ChR2-mCherry) to express ChR2 in a Cre-dependent manner under  
332 the Dlx enhancer (see Methods). We injected this virus into the PFC of CCK-Cre mice to  
333 selectively express ChR2 in CCK+ interneurons (**Fig. 4A**). Whole-cell current-clamp recordings  
334 showed labeled cells could be rapidly and reliably activated by brief pulses of blue light (**Fig. 4A**).  
335 To study inhibitory connections, we then recorded CCK+-evoked currents from unlabeled L5  
336 pyramidal cells in IL PFC (**Fig. 4B**). To detect both EPSCs or IPSCs, we used a low chloride  
337 internal and held at -50 mV, such that inward currents were EPSCs and outward currents were  
338 IPSCs (Glickfeld and Scanziani, 2006). We observed robust CCK+-evoked IPSCs, which were  
339 unaffected by blockers of AMPAR (10  $\mu$ M NBQX) and NMDAR (10  $\mu$ M CPP) but abolished by  
340 blockers of GABA<sub>A</sub>R (10  $\mu$ M gabazine) (**Fig. 4B**; ACSF =  $97 \pm 21$  pA, NBQX+CPP =  $97 \pm 21$  pA,  
341 gabazine =  $0.4 \pm 0.2$  pA; ACSF vs NBQX + CPP, p = 0.69; NBQX + CPP vs gabazine, p = 0.01;  
342 n = 7 cells, 3 animals). These findings indicate that CCK+ interneurons make inhibitory

343 connections onto neighboring L5 pyramidal cells, and that our viral strategy avoids contamination  
344 from excitatory contacts due to inadvertent activation of CCK+ pyramidal cells.

345

346 Previous studies indicate that inhibitory inputs from PV+ and SOM+ interneurons are strongly  
347 biased onto PT cells over nearby IT cells (Anastasiades et al., 2018). To test if similar biases  
348 occur for CCK+ interneurons, we labeled PT and IT cells by injecting retrograde tracers into  
349 periaqueductal gray (PAG) and cPFC, respectively (**Fig. 4C**). Recording from pairs of pyramidal  
350 cells, we found that CCK-evoked IPSCs were larger onto PT cells than IT cells (**Fig. 4D**; IPSC IT  
351 =  $113 \pm 59$  pA, PT =  $245 \pm 79$  pA,  $p = 0.01$ ;  $n = 7$  pairs, 4 animals). Together, these findings  
352 indicate our viral strategy can be used to manipulate CCK+ interneurons, and show that these  
353 cells make cell-type specific connections, preferentially targeting PT cells in L5 of the IL PFC.

354

### 355 **CB1R-mediated DSI depends on the postsynaptic cell-type**

356 In the hippocampus and the amygdala, CCK+ inputs to pyramidal cells are strongly modulated by  
357 endocannabinoids (Lee et al., 2010; Vogel et al., 2016; Wilson and Nicoll, 2001). Postsynaptic  
358 depolarization releases endocannabinoids that act on presynaptic CB1 receptors to prevent  
359 GABA release, a process known as depolarization-induced suppression of inhibition (DSI) (Wilson  
360 and Nicoll, 2001). To study DSI at IT and PT cells, we injected retrogradely transported CTBs in  
361 the cPFC and PAG, along with AAV-Dlx-Flex-ChR2 in the PFC of CCK-Cre mice (**Fig. 5A**).  
362 We evoked DSI with a standard protocol (Glickfeld and Scanziani, 2006; Wilson and Nicoll, 2001),  
363 recording baseline CCK-evoked IPSCs during a train, followed by a 5 s depolarization to +10 mV  
364 and recording a DSI test after an initial 1 s delay, followed by a recovery test after another 30 s  
365 delay (**Fig. 5B**). For these experiments, it was critical to record IPSCs at -50 mV rather than +10  
366 mV, which allows us to control the timing of endocannabinoid release. In voltage-clamp recordings  
367 from retrogradely labeled IT cells, we found that CCK+-evoked IPSCs underwent pronounced DSI  
368 that recovered when inputs were stimulated again 30 seconds later (**Fig. 5C & F**; IPSC<sub>1</sub>: before



369 =  $158 \pm 34$  pA, after =  $91 \pm 24$  pA, recovery =  $149 \pm 33$  pA; DSI ratio =  $0.57 \pm 0.06$ ,  $p = 0.004$ ; n  
370 = 9 cells, 5 animals). We confirmed the involvement of endocannabinoid signaling by blocking  
371 DSI with the CB1R inverse agonist 10  $\mu$ M AM-251 (**Fig. 5D & F**; IPSC<sub>1</sub>: before =  $189 \pm 53$  pA,  
372 after =  $168 \pm 44$  pA, recovery =  $185 \pm 55$ ; DSI ratio =  $0.92 \pm 0.04$ ,  $p = 0.08$ ; n = 7 cells, 4 animals).  
373 We also confirmed this modulation was specific to CCK+ inputs, as PV+ and SOM+-evoked  
374 IPSCs at IT cells had minimal DSI (**Fig. 5F & S2**; IPSC<sub>1</sub> DSI ratio: PV+ =  $0.94 \pm 0.02$ ,  $p = 0.11$ ; n  
375 = 7 cells, 3 animals; SOM+ =  $0.87 \pm 0.05$ ,  $p = 0.02$ ; n = 8 cells, 3 animals; PV+ vs CCK+,  $p =$   
376  $0.0007$ ; SOM+ vs CCK+,  $p = 0.008$ ). Surprisingly, we found minimal DSI at PT cells, indicating  
377 modulation also strongly depends on postsynaptic cell type (**Fig. 5E & F**; IPSC<sub>1</sub> before =  $208 \pm$   
378  $40$  pA, after =  $202 \pm 44$  pA, recovery =  $205 \pm 40$  pA; DSI ratio =  $0.95 \pm 0.04$ ,  $p = 0.22$ ; n = 7 cells,  
379 3 animals). These findings indicate that although CCK+ interneurons broadly contact L5 pyramidal  
380 cells, the connections undergo prominent DSI only at IT cells and not nearby PT cells.

381

### 382 **Endocannabinoid modulation depends on postsynaptic cell type**

383 The dependence of DSI on postsynaptic cell-type could have a presynaptic origin if CB1Rs are  
384 expressed on a subset of CCK+ connections. To test this possibility, we next used  
385 immunocytochemistry to examine CB1R+ puncta at the cell bodies of IT and PT cells. To label  
386 these projection neurons, we injected retrogradely transported AAVrg-TdTomato into the cPFC  
387 and AAVrg-GFP into the PAG, respectively (**Fig. 6A**). While we observed CB1R+ puncta in L5  
388 around the cell bodies of both cell types (**Fig. 6A**), their density was greater at IT cells (**Fig. 6B**;  
389 IT =  $9.3 \pm 0.5$  puncta / cell, PT =  $5.7 \pm 0.5$  puncta / cell,  $p < 0.0001$ ; n = 4 animals, 247 IT cells,  
390 207 PT cells). These results indicate that presynaptic CB1Rs are more prominent at perisomatic  
391 connections onto IT cells, suggesting why these inputs are more strongly affected by DSI.

392

393 If the cell-type specificity of DSI depends on presynaptic factors, we would expect to observe  
394 equivalent differences for pharmacologically evoked endocannabinoid modulation. We further  
395 examined the mechanism of CB1R modulation using wash-in of the agonist WIN 55,212-1 (WIN,  
396 1  $\mu$ M) followed by the inverse agonist AM-251(10  $\mu$ M), which act directly at presynaptic CB1Rs  
397 located on CCK+ axon terminals. In voltage-clamp recordings from L5 IT cells, we found that WIN  
398 reduced CCK+-evoked IPSCs, which was reversed by AM-251 (**Fig. 6C**; baseline =  $234 \pm 53$  pA,  
399 WIN =  $106 \pm 26$  pA, AM-251 =  $206 \pm 50$  pA; baseline vs WIN,  $p = 0.008$ ; WIN vs AM-251,  $p =$   
400  $0.016$ ;  $n = 8$  cells, 5 animals). In contrast, in recordings from PT cells, we found that neither WIN  
401 nor AM-251 had any effect on CCK+-evoked IPSCs, consistent with their lack of DSI (**Fig. 6D**;  
402 baseline =  $292 \pm 55$  pA, WIN =  $250 \pm 36$  pA, AM-251 =  $281 \pm 37$  pA; baseline vs WIN,  $p = 0.81$ ;  
403 WIN vs AM-251,  $p = 0.22$ ;  $n = 7$  cells, 4 animals). Overall, activation of CB1 receptors strongly  
404 reduced CCK+-evoked IPSCs only at IT cells but not neighboring PT cells (**Fig. 6E**; WIN /  
405 baseline: IT =  $0.44 \pm 0.05$ , PT =  $0.92 \pm 0.09$ ,  $p = 0.001$ ). Interestingly, during trains of CCK+  
406 stimulation, wash-in of WIN also increased the paired-pulse ratio (PPR) at IT cells, suggesting  
407 presynaptic modulation by CB1Rs (**Fig. 6F**; IPSC<sub>2</sub> / IPSC<sub>1</sub>: baseline =  $0.48 \pm 0.03$ , WIN =  $0.59 \pm$   
408  $0.03$ , AM-251 =  $0.54 \pm 0.02$ ; baseline vs WIN,  $p = 0.03$ ; WIN vs AM-251,  $p = 0.22$ ;  $n = 7$  cells, 4  
409 animals). These findings demonstrate that differences in presynaptic endocannabinoid signaling  
410 can account for the differential presence of DSI at CCK+ connections onto IT and PT cells.

411

#### 412 **vHPC-evoked feed-forward inhibition is modulated by endocannabinoids**

413 Together, our results suggest that vHPC inputs strongly engage CCK+ interneurons that in turn  
414 robustly inhibit IT cells. Based on the presence of CB1R modulation and DSI at IT cells, we  
415 hypothesized that vHPC-evoked inhibition should also undergo target-specific DSI. In voltage-  
416 clamp recordings from IT cells, we found that repetitive activation of vHPC inputs evoked EPSCs  
417 and IPSCs at -50mV (**Fig. 7A & B**). Depolarization of IT cells (5 s to +10 mV) reduced vHPC-

418 evoked IPSCs but not EPSCs at -50 mV (**Fig. 7B & E**; before, after, recovery: IPSC<sub>1</sub> = 102 ± 14  
419 pA, 51 ± 10 pA, 88 ± 10 pA; EPSC<sub>1</sub> = 248 ± 54 pA, 233 ± 48 pA, 241 ± 52 pA; DSI ratio = 0.47 ±  
420 0.05, p = 0.02; DSE ratio = 0.99 ± 0.06, p = 0.30; n = 7 cells, 4 animals). These findings indicate  
421 that there is no DSE at the vHPC to PFC connection, whereas there is prominent DSI onto IT  
422 cells. Importantly, application of AM-251 minimized DSI, indicating that it is mediated by  
423 endocannabinoids activating CB1Rs (**Fig. 7C & E**; IPSC<sub>1</sub>: before = 136 ± 31 pA, after = 116 ± 29  
424 pA, recovery = 149 ± 35 pA; DSI ratio = 0.84 ± 0.03, p = 0.02; n = 7 cells, 3 animals; DSI in ACSF  
425 vs AM-251, p = 0.0006). Moreover, depolarization of PT cells had minimal effect on either vHPC-  
426 evoked IPSCs or EPSCs, confirming no DSI or DSE onto this postsynaptic cell type (**Fig. 7D &**  
427 **E**; IPSC<sub>1</sub> before = 129 ± 32 pA, after = 114 ± 27 pA, recovery = 134 ± 33 pA; DSI ratio = 0.91 ±  
428 0.05, p = 0.10; DSE ratio = 0.89 ± 0.04, p = 0.01; n = 10 cells, 4 animals). These findings show  
429 that DSI of vHPC-evoked inhibition only occurs at IT cells, suggesting a key role for CCK+  
430 interneurons in the communication between vHPC and PFC.

431 **DISCUSSION**

432 We have explored several new features about the organization and modulation of connections  
433 from vHPC to PFC (**Fig. 7F**). First, we found vHPC contacts and strongly activates CB1R-  
434 expressing CCK+ interneurons in L5 of IL PFC. Second, we showed that CCK+ interneurons  
435 contact nearby pyramidal cells, suggesting they participate in feed-forward inhibition. Third, we  
436 found that CCK+ connections undergo CB1R-mediated modulation and DSI, which is selective  
437 for IT and not PT cells. Fourth, endocannabinoids also modulate vHPC-evoked inhibition, which  
438 also undergoes DSI selectively at IT cells. Together, our results reveal a central role for CCK+  
439 interneurons and endocannabinoid modulation in communication between vHPC and PFC.

440

441 The PFC possesses a rich variety of GABAergic interneurons, which are known to have unique  
442 roles in goal-directed behaviors (Abbas et al., 2018; Courtin et al., 2014; Kepecs and Fishell,  
443 2014; Kvitsiani et al., 2013). Interestingly, the PFC has fewer PV+ interneurons and more CCK+  
444 interneurons compared to other cortices (Kim et al., 2017; Whissell et al., 2015). Our results  
445 indicate that CCK+ interneurons are abundant in L5 of IL PFC, which we previously showed  
446 receives the strongest connections from vHPC (Liu and Carter, 2018). We found these cells are  
447 distinct from PV+ and SOM+ interneurons, with different morphological and physiological  
448 properties. We also found that they are enriched in presynaptic CB1Rs, as in other parts of cortex,  
449 hippocampus and amygdala (Armstrong and Soltesz, 2012; Bodor et al., 2005; Vogel et al., 2016).  
450 The enrichment of CCK+ interneurons across limbic areas is consistent with a role in emotional  
451 behaviors (Freund and Katona, 2007; Klausberger et al., 2005). In the future, it will be interesting  
452 to characterize the properties of CCK+ interneurons in other layers and subregions of PFC.

453

454 One of our key results is that vHPC inputs densely contact and strongly activate CCK+  
455 interneurons in L5 of IL PFC. vHPC inputs are strong and depressing onto CCK+ interneurons, in  
456 contrast to the facilitating inputs onto IT cells (Liu & Carter, 2018). Importantly, vHPC-evoked

457 firing of CCK+ interneurons occurs without activation of IT cells, indicating polysynaptic recurrent  
458 activity is not required for activation of CCK+ interneurons, which are therefore likely to mediate  
459 feed-forward inhibition. With higher intensity of vHPC stimulation, CCK+ interneurons may also  
460 be activated by local inputs, as observed in the hippocampus (Glickfeld and Scanziani, 2006),  
461 and similar to SOM+ interneurons in the cortex (Silberberg and Markram, 2007). Indeed, in the  
462 hippocampus, CCK+ interneurons have been shown to participate in both feed-forward and feed-  
463 back networks (Basu et al., 2013; Glickfeld and Scanziani, 2006). Our findings show that CCK+  
464 interneurons have an important and underappreciated role in hippocampal evoked feed-forward  
465 inhibition, and it will be important to assess whether this generalizes to other inputs to the PFC.

466  
467 While we focused on CCK+ interneurons, we also confirmed that vHPC inputs engage other  
468 interneurons in L5 of IL PFC. Activation of PV+ interneurons is strong, consistent with their role  
469 in feed-forward inhibition in PFC and elsewhere (Anastasiades et al., 2018; Cruikshank et al.,  
470 2007; Delevich et al., 2015; Gabernet et al., 2005; McGarry and Carter, 2016). Previous results  
471 have indicated that vHPC engages PV+ interneurons in superficial layers of the medial PFC  
472 (Marek et al., 2018). In contrast, we find particularly strong connections in L5, where our previous  
473 study shows vHPC inputs are most dense (Liu and Carter, 2018). SOM+ interneuron activation is  
474 weak, but increases with repetitive activity, similar to BLA inputs to superficial PFC (McGarry and  
475 Carter, 2016). The engagement of SOM+ interneurons is consistent with a role in oscillations  
476 linking the vHPC and PFC and involvement in working memory (Abbas et al., 2018). Interestingly,  
477 the activation of SOM+ interneurons by long-range inputs also occurs in granular sensory cortex,  
478 where it also builds during stimulus trains, suggesting this is a general property (Tan et al., 2008).

479  
480 We found that CCK+ interneurons make strong inhibitory connections onto neighboring pyramidal  
481 cells in L5 of the IL PFC. Importantly, these connections are much stronger onto PT cells, similar  
482 to our previous findings for PV+ and SOM+ interneurons (Anastasiades et al., 2018). Biased

483 inhibition is thus a general property of inhibitory connections in the PFC, although strength also  
484 depends on intrinsic properties (Anastasiades et al., 2018). In the hippocampus, CCK+  
485 interneurons also make unique connections onto different pyramidal cell populations, although  
486 these are typically defined by sublayer (Valero et al., 2015). Studying the output of CCK+  
487 interneurons was enabled by using Cre-dependent viruses with Dlx enhancers (Dimidschstein et  
488 al., 2016). These tools allowed us to avoid simultaneous activation of pyramidal cells, which also  
489 express CCK (Taniguchi et al., 2011). In the future, this approach can be used to study how CCK+  
490 interneurons contact other cells in the local network. For example, CCK+ interneurons may also  
491 target other classes of interneurons, as observed in the hippocampus (Daw et al., 2009).

492  
493 Another key finding of our work was that endocannabinoid modulation of CCK+ connections  
494 depends on the postsynaptic target. We observe robust DSI at IT cells, but minimal DSI at nearby  
495 PT cells, despite the latter receiving stronger connections. This cell-type specific DSI has rarely  
496 been examined in the cortex, as most studies do not distinguish projection target. However, a  
497 recent study also showed differential DSI at CCK+ connections onto projection neurons in the  
498 amygdala (Vogel et al., 2016). The dependence of DSI on the postsynaptic target should be taken  
499 into account in future studies of CCK+-mediated inhibition. Importantly, our experiments  
500 suggested no equivalent DSI for either PV+ or SOM+ connections onto IT cells. These results  
501 suggest CCK+ connections are a primary target of endocannabinoid modulation, in agreement  
502 with previous studies in the cortex, hippocampus and other brain regions (Bodor et al., 2005;  
503 Glickfeld et al., 2008; Gonchar et al., 2007; Katona et al., 1999; Kawaguchi and Kondo, 2002).

504  
505 In principle, the selectivity of DSI at CCK+ connections onto IT cells could reflect differences in  
506 postsynaptic release or presynaptic detection of endocannabinoids. Our results are consistent  
507 with the latter explanation. First, our immunocytochemistry shows more CB1R puncta around IT  
508 cells, suggesting these receptors are selectively localized. This result was particularly surprising

509 because we also found CCK+ interneurons make stronger connections onto PT cells. Second,  
510 direct activation of CB1Rs with WIN reduces CCK-evoked IPSCs only at IT cells, with no effect at  
511 neighboring PT cells. This experiment bypasses postsynaptic release of endocannabinoids,  
512 suggesting a presynaptic mechanism can account for specificity of DSI. The increase in PPR is  
513 also consistent with presynaptic modulation by CB1R, suggesting reduced release probability  
514 (Wilson et al., 2001). This work underscores that endocannabinoid modulation is cell-type  
515 specific, and it will be important to examine if similar specificity occurs in other regions of the PFC.  
516

517 The ability of vHPC inputs to engage CCK+ interneurons, which in turn contact pyramidal cells,  
518 implicates a key role in feed-forward inhibition. Consistent with this idea, we observed prominent  
519 CB1R-mediated DSI of vHPC-evoked inhibition only at IT cells and not neighboring PT cells.  
520 Because there is no change in excitation, this will selectively increase the excitation / inhibition  
521 (E / I) ratio at IT cells. This could allow the vHPC to more effectively activate IT cells compared to  
522 neighboring PT cells, perhaps elevating local processing within the PFC. Altered E / I balance  
523 could also potentially shift PFC output to other intratelencephalic targets throughout the brain,  
524 including targets in the cortex, striatum, amygdala and claustrum (Anastasiades et al., 2019).  
525 Together, our findings suggest that both CCK+ interneurons and endocannabinoid modulation  
526 play a fundamental role in vHPC to PFC communication. In the future, it will be important to assess  
527 the contribution of this circuit to emotional control and disorders, including threat learning and  
528 anxiety disorders (Peters et al., 2010; Sierra-Mercado et al., 2011; Sotres-Bayon et al., 2012).

529 **REFERENCES**

- 530 Abbas, A.I., Sundiang, M.J.M., Henoch, B., Morton, M.P., Bolkan, S.S., Park, A.J., Harris, A.Z.,  
531 Kellendonk, C., and Gordon, J.A. (2018). Somatostatin Interneurons Facilitate Hippocampal-  
532 Prefrontal Synchrony and Prefrontal Spatial Encoding. *Neuron* 100, 926-939 e923.
- 533 Anastasiades, P.G., Marlin, J.J., and Carter, A.G. (2018). Cell-Type Specificity of Callosally  
534 Evoked Excitation and Feedforward Inhibition in the Prefrontal Cortex. *Cell Rep* 22, 679-692.
- 535 Armstrong, C., and Soltesz, I. (2012). Basket cell dichotomy in microcircuit function. *J Physiol*  
536 590, 683-694.
- 537 Atallah, B.V., Bruns, W., Carandini, M., and Scanziani, M. (2012). Parvalbumin-expressing  
538 interneurons linearly transform cortical responses to visual stimuli. *Neuron* 73, 159-170.
- 539 Basu, J., Srinivas, K.V., Cheung, S.K., Taniguchi, H., Huang, Z.J., and Siegelbaum, S.A. (2013).  
540 A cortico-hippocampal learning rule shapes inhibitory microcircuit activity to enhance  
541 hippocampal information flow. *Neuron* 79, 1208-1221.
- 542 Bodor, A.L., Katona, I., Nyiri, G., Mackie, K., Ledent, C., Hajos, N., and Freund, T.F. (2005).  
543 Endocannabinoid signaling in rat somatosensory cortex: laminar differences and involvement  
544 of specific interneuron types. *J Neurosci* 25, 6845-6856.
- 545 Chalifoux, J.R., and Carter, A.G. (2010). GABAB receptors modulate NMDA receptor calcium  
546 signals in dendritic spines. *Neuron* 66, 101-113.
- 547 Courtin, J., Chaudun, F., Rozeske, R.R., Karalis, N., Gonzalez-Campo, C., Wurtz, H., Abdi, A.,  
548 Baufreton, J., Bienvenu, T.C., and Herry, C. (2014). Prefrontal parvalbumin interneurons  
549 shape neuronal activity to drive fear expression. *Nature* 505, 92-96.
- 550 Cruikshank, S.J., Lewis, T.J., and Connors, B.W. (2007). Synaptic basis for intense  
551 thalamocortical activation of feedforward inhibitory cells in neocortex. *Nat Neurosci* 10, 462-  
552 468.



- 553 Daw, M.I., Tricoire, L., Erdelyi, F., Szabo, G., and McBain, C.J. (2009). Asynchronous transmitter  
554 release from cholecystokinin-containing inhibitory interneurons is widespread and target-cell  
555 independent. *J Neurosci* 29, 11112-11122.
- 556 Delevich, K., Tucciarone, J., Huang, Z.J., and Li, B. (2015). The mediodorsal thalamus drives  
557 feedforward inhibition in the anterior cingulate cortex via parvalbumin interneurons. *J Neurosci*  
558 35, 5743-5753.
- 559 Dimidschstein, J., Chen, Q., Tremblay, R., Rogers, S.L., Saldi, G.A., Guo, L., Xu, Q., Liu, R., Lu,  
560 C., Chu, J., *et al.* (2016). A viral strategy for targeting and manipulating interneurons across  
561 vertebrate species. *Nat Neurosci* 19, 1743-1749.
- 562 Dudok, B., Barna, L., Ledri, M., Szabo, S.I., Szabadits, E., Pinter, B., Woodhams, S.G.,  
563 Henstridge, C.M., Balla, G.Y., Nyilas, R., *et al.* (2015). Cell-specific STORM super-resolution  
564 imaging reveals nanoscale organization of cannabinoid signaling. *Nat Neurosci* 18, 75-86.
- 565 Euston, D.R., Gruber, A.J., and McNaughton, B.L. (2012). The role of medial prefrontal cortex in  
566 memory and decision making. *Neuron* 76, 1057-1070.
- 567 Freund, T.F. (2003). Interneuron Diversity series: Rhythm and mood in perisomatic inhibition.  
568 *Trends Neurosci* 26, 489-495.
- 569 Freund, T.F., and Katona, I. (2007). Perisomatic inhibition. *Neuron* 56, 33-42.
- 570 Gabernet, L., Jadhav, S.P., Feldman, D.E., Carandini, M., and Scanziani, M. (2005).  
571 Somatosensory integration controlled by dynamic thalamocortical feed-forward inhibition.  
572 *Neuron* 48, 315-327.
- 573 Gentet, L.J., Kremer, Y., Taniguchi, H., Huang, Z.J., Staiger, J.F., and Petersen, C.C. (2012).  
574 Unique functional properties of somatostatin-expressing GABAergic neurons in mouse barrel  
575 cortex. *Nat Neurosci* 15, 607-612.
- 576 Glickfeld, L.L., Atallah, B.V., and Scanziani, M. (2008). Complementary modulation of somatic  
577 inhibition by opioids and cannabinoids. *J Neurosci* 28, 1824-1832.

578 Glickfeld, L.L., and Scanziani, M. (2006). Distinct timing in the activity of cannabinoid-sensitive  
579 and cannabinoid-insensitive basket cells. *Nat Neurosci* 9, 807-815.

580 Godsil, B.P., Kiss, J.P., Spedding, M., and Jay, T.M. (2013). The hippocampal-prefrontal pathway:  
581 the weak link in psychiatric disorders? *Eur Neuropsychopharmacol* 23, 1165-1181.

582 Gonchar, Y., Wang, Q., and Burkhalter, A. (2007). Multiple distinct subtypes of GABAergic  
583 neurons in mouse visual cortex identified by triple immunostaining. *Front Neuroanat* 1, 3.

584 Hippenmeyer, S., Vrieseling, E., Sigrist, M., Portmann, T., Laengle, C., Ladle, D.R., and Arber, S.  
585 (2005). A developmental switch in the response of DRG neurons to ETS transcription factor  
586 signaling. *PLoS Biol* 3, e159.

587 Hoover, W.B., and Vertes, R.P. (2007). Anatomical analysis of afferent projections to the medial  
588 prefrontal cortex in the rat. *Brain Struct Funct* 212, 149-179.

589 Jones, M.W., and Wilson, M.A. (2005). Theta rhythms coordinate hippocampal-prefrontal  
590 interactions in a spatial memory task. *PLoS Biol* 3, e402.

591 Katona, I., Sperlagh, B., Sik, A., Kafalvi, A., Vizi, E.S., Mackie, K., and Freund, T.F. (1999).  
592 Presynaptically located CB1 cannabinoid receptors regulate GABA release from axon  
593 terminals of specific hippocampal interneurons. *J Neurosci* 19, 4544-4558.

594 Kawaguchi, Y., and Kondo, S. (2002). Parvalbumin, somatostatin and cholecystinin as  
595 chemical markers for specific GABAergic interneuron types in the rat frontal cortex. *J*  
596 *Neurocytol* 31, 277-287.

597 Kepecs, A., and Fishell, G. (2014). Interneuron cell types are fit to function. *Nature* 505, 318-326.

598 Kim, Y., Yang, G.R., Pradhan, K., Venkataraju, K.U., Bota, M., Garcia Del Molino, L.C., Fitzgerald,  
599 G., Ram, K., He, M., Levine, J.M., *et al.* (2017). Brain-wide Maps Reveal Stereotyped Cell-  
600 Type-Based Cortical Architecture and Subcortical Sexual Dimorphism. *Cell* 171, 456-469  
601 e422.

602 Klausberger, T., Marton, L.F., O'Neill, J., Huck, J.H., Dalezios, Y., Fuentealba, P., Suen, W.Y.,  
603 Papp, E., Kaneko, T., Watanabe, M., *et al.* (2005). Complementary roles of cholecystinin-

604 and parvalbumin-expressing GABAergic neurons in hippocampal network oscillations. *J*  
605 *Neurosci* 25, 9782-9793.

606 Kvitsiani, D., Ranade, S., Hangya, B., Taniguchi, H., Huang, J.Z., and Kepecs, A. (2013). Distinct  
607 behavioural and network correlates of two interneuron types in prefrontal cortex. *Nature* 498,  
608 363-366.

609 Lee, S.H., Foldy, C., and Soltesz, I. (2010). Distinct endocannabinoid control of GABA release at  
610 perisomatic and dendritic synapses in the hippocampus. *J Neurosci* 30, 7993-8000.

611 Little, J.P., and Carter, A.G. (2012). Subcellular synaptic connectivity of layer 2 pyramidal neurons  
612 in the medial prefrontal cortex. *J Neurosci* 32, 12808-12819.

613 Little, J.P., and Carter, A.G. (2013). Synaptic mechanisms underlying strong reciprocal  
614 connectivity between the medial prefrontal cortex and basolateral amygdala. *J Neurosci* 33,  
615 15333-15342.

616 Liu, X., and Carter, A.G. (2018). Ventral Hippocampal Inputs Preferentially Drive Corticocortical  
617 Neurons in the Infralimbic Prefrontal Cortex. *J Neurosci* 38, 7351-7363.

618 Madisen, L., Zwingman, T.A., Sunkin, S.M., Oh, S.W., Zariwala, H.A., Gu, H., Ng, L.L., Palmiter,  
619 R.D., Hawrylycz, M.J., Jones, A.R., *et al.* (2010). A robust and high-throughput Cre reporting  
620 and characterization system for the whole mouse brain. *Nat Neurosci* 13, 133-140.

621 Marek, R., Jin, J., Goode, T.D., Giustino, T.F., Wang, Q., Acca, G.M., Holehonnur, R., Ploski,  
622 J.E., Fitzgerald, P.J., Lynagh, T., *et al.* (2018). Hippocampus-driven feed-forward inhibition of  
623 the prefrontal cortex mediates relapse of extinguished fear. *Nat Neurosci* 21, 384-392.

624 McGarry, L.M., and Carter, A.G. (2016). Inhibitory Gating of Basolateral Amygdala Inputs to the  
625 Prefrontal Cortex. *J Neurosci* 36, 9391-9406.

626 Miller, E.K., and Cohen, J.D. (2001). An integrative theory of prefrontal cortex function. *Annu Rev*  
627 *Neurosci* 24, 167-202.

628 Padilla-Coreano, N., Bolkan, S.S., Pierce, G.M., Blackman, D.R., Hardin, W.D., Garcia-Garcia,  
629 A.L., Spellman, T.J., and Gordon, J.A. (2016). Direct Ventral Hippocampal-Prefrontal Input Is  
630 Required for Anxiety-Related Neural Activity and Behavior. *Neuron* 89, 857-866.

631 Peters, J., Dieppa-Perea, L.M., Melendez, L.M., and Quirk, G.J. (2010). Induction of fear  
632 extinction with hippocampal-infralimbic BDNF. *Science* 328, 1288-1290.

633 Petreanu, L., Mao, T., Sternson, S.M., and Svoboda, K. (2009). The subcellular organization of  
634 neocortical excitatory connections. *Nature* 457, 1142-1145.

635 Phillips, M.L., Robinson, H.A., and Pozzo-Miller, L. (2019). Ventral hippocampal projections to the  
636 medial prefrontal cortex regulate social memory. *Elife* 8.

637 Siapas, A.G., Lubenov, E.V., and Wilson, M.A. (2005). Prefrontal phase locking to hippocampal  
638 theta oscillations. *Neuron* 46, 141-151.

639 Sierra-Mercado, D., Padilla-Coreano, N., and Quirk, G.J. (2011). Dissociable roles of prelimbic  
640 and infralimbic cortices, ventral hippocampus, and basolateral amygdala in the expression  
641 and extinction of conditioned fear. *Neuropsychopharmacology* 36, 529-538.

642 Sigurdsson, T., and Duvarci, S. (2015). Hippocampal-Prefrontal Interactions in Cognition,  
643 Behavior and Psychiatric Disease. *Front Syst Neurosci* 9, 190.

644 Silberberg, G., and Markram, H. (2007). Disynaptic inhibition between neocortical pyramidal cells  
645 mediated by Martinotti cells. *Neuron* 53, 735-746.

646 Sotres-Bayon, F., Sierra-Mercado, D., Pardilla-Delgado, E., and Quirk, G.J. (2012). Gating of fear  
647 in prelimbic cortex by hippocampal and amygdala inputs. *Neuron* 76, 804-812.

648 Spellman, T., Rigotti, M., Ahmari, S.E., Fusi, S., Gogos, J.A., and Gordon, J.A. (2015).  
649 Hippocampal-prefrontal input supports spatial encoding in working memory. *Nature* 522, 309-  
650 314.

651 Tan, Z., Hu, H., Huang, Z.J., and Agmon, A. (2008). Robust but delayed thalamocortical activation  
652 of dendritic-targeting inhibitory interneurons. *Proc Natl Acad Sci U S A* 105, 2187-2192.

- 653 Taniguchi, H., He, M., Wu, P., Kim, S., Paik, R., Sugino, K., Kvitsiani, D., Fu, Y., Lu, J., Lin, Y., *et*  
654 *al.* (2011). A resource of Cre driver lines for genetic targeting of GABAergic neurons in  
655 cerebral cortex. *Neuron* 71, 995-1013.
- 656 Tremblay, R., Lee, S., and Rudy, B. (2016). GABAergic Interneurons in the Neocortex: From  
657 Cellular Properties to Circuits. *Neuron* 91, 260-292.
- 658 Valero, M., Cid, E., Averkin, R.G., Aguilar, J., Sanchez-Aguilera, A., Viney, T.J., Gomez-  
659 Dominguez, D., Bellistri, E., and de la Prida, L.M. (2015). Determinants of different deep and  
660 superficial CA1 pyramidal cell dynamics during sharp-wave ripples. *Nat Neurosci* 18, 1281-  
661 1290.
- 662 Vogel, E., Krabbe, S., Grundemann, J., Wamsteeker Cusulin, J.I., and Luthi, A. (2016). Projection-  
663 Specific Dynamic Regulation of Inhibition in Amygdala Micro-Circuits. *Neuron* 91, 644-651.
- 664 Whissell, P.D., Cajanding, J.D., Fogel, N., and Kim, J.C. (2015). Comparative density of CCK-  
665 and PV-GABA cells within the cortex and hippocampus. *Front Neuroanat* 9, 124.
- 666 Wilson, R.I., Kunos, G., and Nicoll, R.A. (2001). Presynaptic specificity of endocannabinoid  
667 signaling in the hippocampus. *Neuron* 31, 453-462.
- 668 Wilson, R.I., and Nicoll, R.A. (2001). Endogenous cannabinoids mediate retrograde signalling at  
669 hippocampal synapses. *Nature* 410, 588-592.
- 670 Zucker, R.S., and Regehr, W.G. (2002). Short-term synaptic plasticity. *Annu Rev Physiol* 64, 355-  
671 405.

672 **FIGURE LEGENDS**

673

674 **Figure 1: vHPC-evoked feed-forward inhibition and CCK+ interneurons.**

675 **A)** Schematic for injections of AAV-ChR2-EYFP into vHPC and CTB-647 into cPFC.

676 **B)** *Left*, Confocal image of vHPC axons (blue) in IL PFC. Scale bar = 100  $\mu\text{m}$ . *Right*, Confocal  
677 image of biocytin-filled L5 IT cell in IL PFC. Scale bar = 100  $\mu\text{m}$ .

678 **C)** *Left*, Average vHPC-evoked EPSCs at -65 mV (black) and IPSCs at +15 mV (grey). Blue  
679 arrows = 5 pulses at 20 Hz. *Right*, Average response amplitudes as function of pulse number  
680 (n = 7 cells, 3 animals).

681 **D)** Td-tomato labeling of PV+ (blue) and SOM+ (green) interneurons in PV-Cre x Ai14 and SOM-  
682 Cre x Ai14 animals, respectively.

683 **E)** *Left*, Schematic for injections of viruses into PFC of CCK-Cre mouse. *Middle*, Injection of AAV-  
684 DIO-GFP labels CCK+ interneurons and pyramidal cells (n = 3 animals). *Right*, Injection of  
685 AAV-Dlx-Flex-GFP labels CCK+ interneurons (n = 3 animals). Scale bars = 100  $\mu\text{m}$ .

686 **F)** Quantification of co-labeling of CCK+ interneurons with PV (top) and SOM (bottom) (PV  
687 staining, n = 308 cells, 17 slices, 6 animals; SOM staining, n = 105 cells, 8 slices, 3 animals).

688 **G)** *Left*, Confocal image of a biocytin-filled CCK+ interneuron in L5 of IL PFC. Scale bar = 100  $\mu\text{m}$ .  
689 *Right*, Response to positive and negative current injections.

690 **H)** *Left*, Confocal images of GFP (green), anti-CB1R staining (purple), anti-PV staining (blue),  
691 and merge. Arrow heads: white = GFP+CB1R+ co-labeling, yellow = PV+CB1R+ co-labeling.

692 *Middle*, Quantification of PV+CB1R+ and GFP+CB1R+ quanta per  $10^3 \mu\text{m}^2$  (n = 9 sections, 3  
693 animals). *Right*, Quantification of the ratios of CB1R+ puncta among PV+ and GFP+ puncta.

694 Each line represents counts from one slice.

695 **Figure 2: vHPC inputs differentially engage PV+, SOM+ and CCK+ interneurons.**

696 **A)** *Left*, Average vHPC-evoked EPSCs at pairs of L5 IT (grey) and CCK+ (purple) cells in IL PFC.

697 Blue arrow = light pulse. *Middle*, Summary of EPSC amplitudes. *Right*, Summary of CCK+ /

698 IT EPSC amplitude ratios (n = 9 pairs, 4 animals).

699 **(B – C)** Similar to (A) for pairs of IT and PV+ cells (n = 9 pairs, 4 animals) or pairs of IT and SOM+

700 cells (n = 9 pairs, 4 animals).

701 **D)** *Left*, vHPC-evoked EPSPs and APs recorded in current-clamp from resting membrane

702 potential at pairs of L5 IT (grey) and CCK+ (purple) cells in IL PFC, with 5 traces offset for

703 each cell. *Right*, Summary of AP probability at pairs of IT and CCK+ cells. Blue arrow =

704 3.5 mW light pulse (n = 9 pairs, 4 animals).

705 **(E – F)** Similar to (D) for pairs of IT and PV+ cells (3.5 mW light pulses, n = 8 pairs, 4 animals) or

706 pairs of IT and SOM+ cells (4.8 mW light pulses, n = 7 pairs, 3 animals).

707 \* p<0.05

708 **Figure 3: vHPC inputs drive interneurons with distinct temporal dynamics.**

709 **A)** Average vHPC-evoked EPSCs at CCK+ interneurons, recorded in voltage-clamp at -65 mV  
710 (5 pulses at 20 Hz). Blue arrows = light pulses (n = 6 cells, 3 animals).

711 **B)** Similar to (A) for PV+ interneurons (n = 7 cells, 3 animals).

712 **C)** Similar to (A) for SOM+ interneurons (n = 8 cells, 3 animals).

713 **D)** Average paired-pulse ratio (PPR) of vHPC-evoked EPSCs at CCK+, PV+, and SOM+  
714 interneurons.

715 **E)** vHPC-evoked EPSPs and APs, recorded in current-clamp from resting membrane potential  
716 at an example CCK+ interneuron in L5 of IL PFC, with 5 traces offset for the cell. Blue arrows  
717 = light pulses (n = 12 cells, 5 animals).

718 **F)** Similar to (E) for PV+ interneurons (n = 6 cells, 3 animals).

719 **G)** Similar to (E) for SOM+ interneurons. Note that each SOM+ cell was studied with a nearby IT  
720 cell under same recording and stimulation conditions, where the absence of AP firing at IT  
721 cells indicated subthreshold of network recurrent activation (n = 6 cells, 3 animals).

722 **H)** Summary of average AP probability as a function of pulse number for CCK+, PV+, and SOM+  
723 interneurons.

724 \* p<0.05



725 **Figure 4: CCK+ interneurons make connections onto pyramidal cells.**

726 **A)** *Left*, Injections of AAV-Dlx-Flex-ChR2 into the PFC of CCK-Cre animals. *Right*, Light-evoked  
727 firing of a ChR2-expressing CCK+ interneuron. Purple arrows = 5 light pulses at 20 Hz.

728 **B)** *Left*, Average CCK+-evoked IPSCs at L5 pyramidal cells in IL PFC. When recording at -50 mV  
729 with a low Cl<sup>-</sup> internal solution, only outward IPSCs were observed (black). IPSCs were  
730 unchanged after wash-in of NBQX + CPP (blue) but abolished by wash-in of gabazine (red).

731 *Right*, Summary of IPSC amplitudes in the different conditions. Purple arrow = light pulse.

732 **C)** Schematic of triple injections, with CTB-647 into cPFC, red retrobeads into PAG, and AAV-  
733 Dlx-Flex-ChR2 into PFC.

734 **D)** *Left*, Recording schematic of CCK+ inputs onto IT and PT cells. Middle, CCK-evoked IPSCs  
735 at PT and IT cells. *Right*, Summary of IPSC amplitudes at PT and IT cells (7 cells, 4 animals).

736 \* p<0.05

737 **Figure 5: Prominent DSI of CCK+ inputs onto IT cells.**

738 **A)** Injection schematic of CTB-647 into cPFC and red retrobeads (RB) into PAG, along with AAV-  
739 Dlx-Flex-ChR2 into PFC of CCK-Cre mice.

740 **B)** Experimental procedure for depolarization-induced suppression of inhibition (DSI), with 30 s  
741 baseline, followed by 5 s depolarization to +10 mV, and 30 s recovery, repeated every 30 s.

742 **C)** *Left*, Average CCK+-evoked IPSCs at IT cells before (black), after (red) and recovery from  
743 (gray) the brief depolarization. Purple arrows = 5 light pulses at 20 Hz. *Right*, Summary of  
744 amplitudes of the first IPSC, showing robust DSI (n = 9 cells, 5 animals).

745 **D)** Similar to (C) in the presence of 10  $\mu$ M AM-251, which abolished DSI (n = 7 cells, 4 animals).

746 **E)** Similar to (C) for CCK+-evoked IPSCs at PT cells, showing no DSI (n = 7 cells, 3 animals).

747 **F)** Summary of DSI ratios (IPSC after depolarization / IPSC before depolarization) across  
748 experiments in (C – E).

749 \* p<0.05

750 **Figure 6: Cell-type specific modulation by CB1 receptors.**

- 751 **A)** *Left*, Injection schematic of AAVrg-GFP into PFC and AAVrg-tdTomato into PAG. *Middle*,
- 752 Confocal image of IT cells (cyan), PT cells (purple) and CB1 receptors (yellow). Scale bar =
- 753 50  $\mu\text{m}$ . *Right*, Magnification of region on left. Scale bar = 20  $\mu\text{m}$ .
- 754 **B)** Quantification of CB1R puncta in IT and PT cells, each dot represents the average puncta
- 755 number per cell in a slice (n = 247 IT cells, 207 PT cells, 4 animals).
- 756 **C)** *Left*, Schematic of recordings from IT cells in L5 of IL PFC. *Middle*, Average CCK+-evoked
- 757 IPSCs at IT cells at baseline (black), 10 min after wash-in of 1  $\mu\text{M}$  WIN 55,212-2 (red), and
- 758 15 minutes after additional wash-in of 10  $\mu\text{M}$  AM-251 (gray). Purple arrow = light stimulation.
- 759 *Right*, Summary of IPSC amplitudes (n = 8 cells, 5 animals).
- 760 **D)** Similar to (C) for CCK+-evoked IPSCs at PT cells, showing lack of modulation by CB1R (n =
- 761 7 cells, 4 animals).
- 762 **E)** *Left*, Summary of time course of modulation at IT and PT cells, with IPSC amplitudes
- 763 normalized to the average response during the first 5 minutes. *Right*, Summary of normalized
- 764 IPSC amplitudes after WIN wash-in.
- 765 **F)** Similar to (C) for trains of CCK+ inputs onto IT cells (5 pulses at 20 Hz), showing small
- 766 increase in PPR after wash-in of 1  $\mu\text{M}$  WIN 55,212-2 (n = 7 cells, 4 animals).

767 \* p<0.05

768 **Figure 7: vHPC-evoked feed-forward inhibition at IT cells undergoes DSI.**

769 **A)** Injection schematic, showing CTB-647 in cPFC, red retrobeads (RB) in PAG, along with AAV-  
770 ChR2-EYFP in vHPC.

771 **B)** *Left*, Average vHPC-evoked EPSCs and IPSCs at IT cells in L5 IL PFC, before (black),  
772 immediately after depolarization (red), and after recovery (gray) (same paradigm as Figure 5).  
773 Blue arrows = light stimulation. *Right*, Summary of amplitudes of first vHPC-evoked IPSCs (n  
774 = 7 cells, 4 animals).

775 **C)** Similar to (B) in the presence of 10  $\mu$ M AM-251, which reduces DSI (n = 7 cells, 3 animals).

776 **D)** Similar to (B) for PT cells, showing no DSI (n = 10 cells, 4 cells).

777 **E)** Summary of DSI and DSE ratios (amplitude ratios of IPSCs or EPSCs after / before the  
778 depolarizations) across the different experiments.

779 **F)** Summary schematic for vHPC-evoked feed-forward inhibition in IL PFC. vHPC inputs directly  
780 contact IT over PT cells to evoke EPSCs. vHPC inputs also engage multiple interneurons to  
781 evoke local inhibition. Inhibition mediated by CCK+ interneurons displays robust  
782 endocannabinoid-mediated DSI, but only at IT cells, and not neighboring PT cells.

783 \* p < 0.05

784 **Figure S1: Properties of CCK+ interneurons in L5 IL PFC.**

785 **A)** Co-labeling of GFP-expressing CCK+ interneurons (purple) with PV (blue) and SOM (green).

786 Immunohistochemistry of GFP and either PV (top) or SOM (bottom) in PFC slices from CCK-

787 Cre animals injected with AAV-Dlx-Flex-GFP. From left to right: GFP; PV or SOM; merged.

788 Scale bar = 100  $\mu$ m.

789 **B)** *Left*, Firing frequency (F) vs. current (I) curve for CCK+ cells. *Right*, Summary of membrane

790 resting potential ( $V_{rest}$ ) and input resistance ( $R_{in}$ ) of CCK+ interneurons (n = 12 cells, 4

791 animals).

792 **Figure S2: Minimal DSI at PV+ or SOM+ interneuron connections onto IT cells.**

793 **A)** Injection schematics of CTB-647 into cPFC and AAV-Flex-ChR2 in PFC of PV-Cre mice.

794 **B)** *Left*, Average PV+ inputs onto IT cells, evoked by 5 pulses at 20 Hz, before (black),  
795 immediately after the brief depolarization (red) and after recovery (gray). Blue arrow = light  
796 stimulation. *Right*, Amplitudes of the first IPSCs (n = 7 cells, 3 animals).

797 **C – D)** Similar to (A – B) for SOM+ inputs onto IT cells (n = 8 cells, 3 animals).

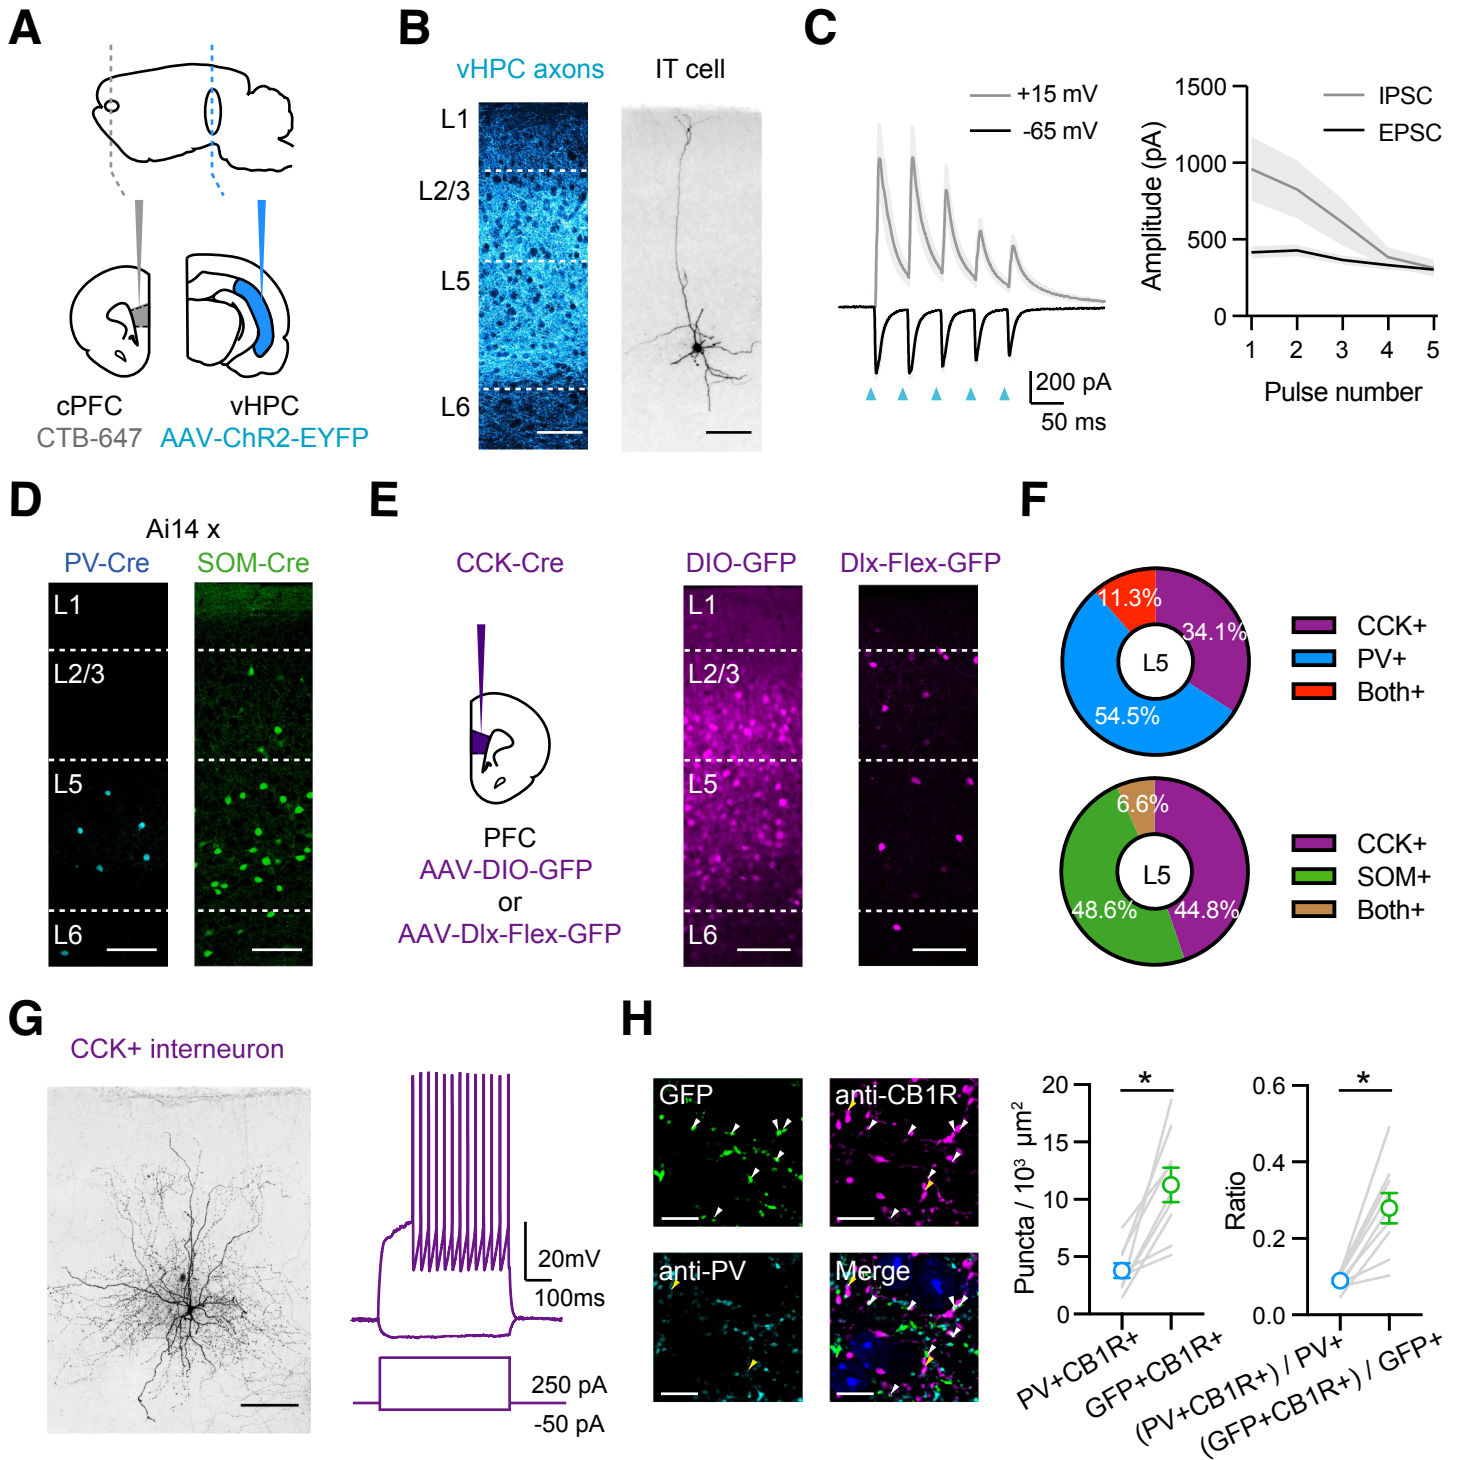

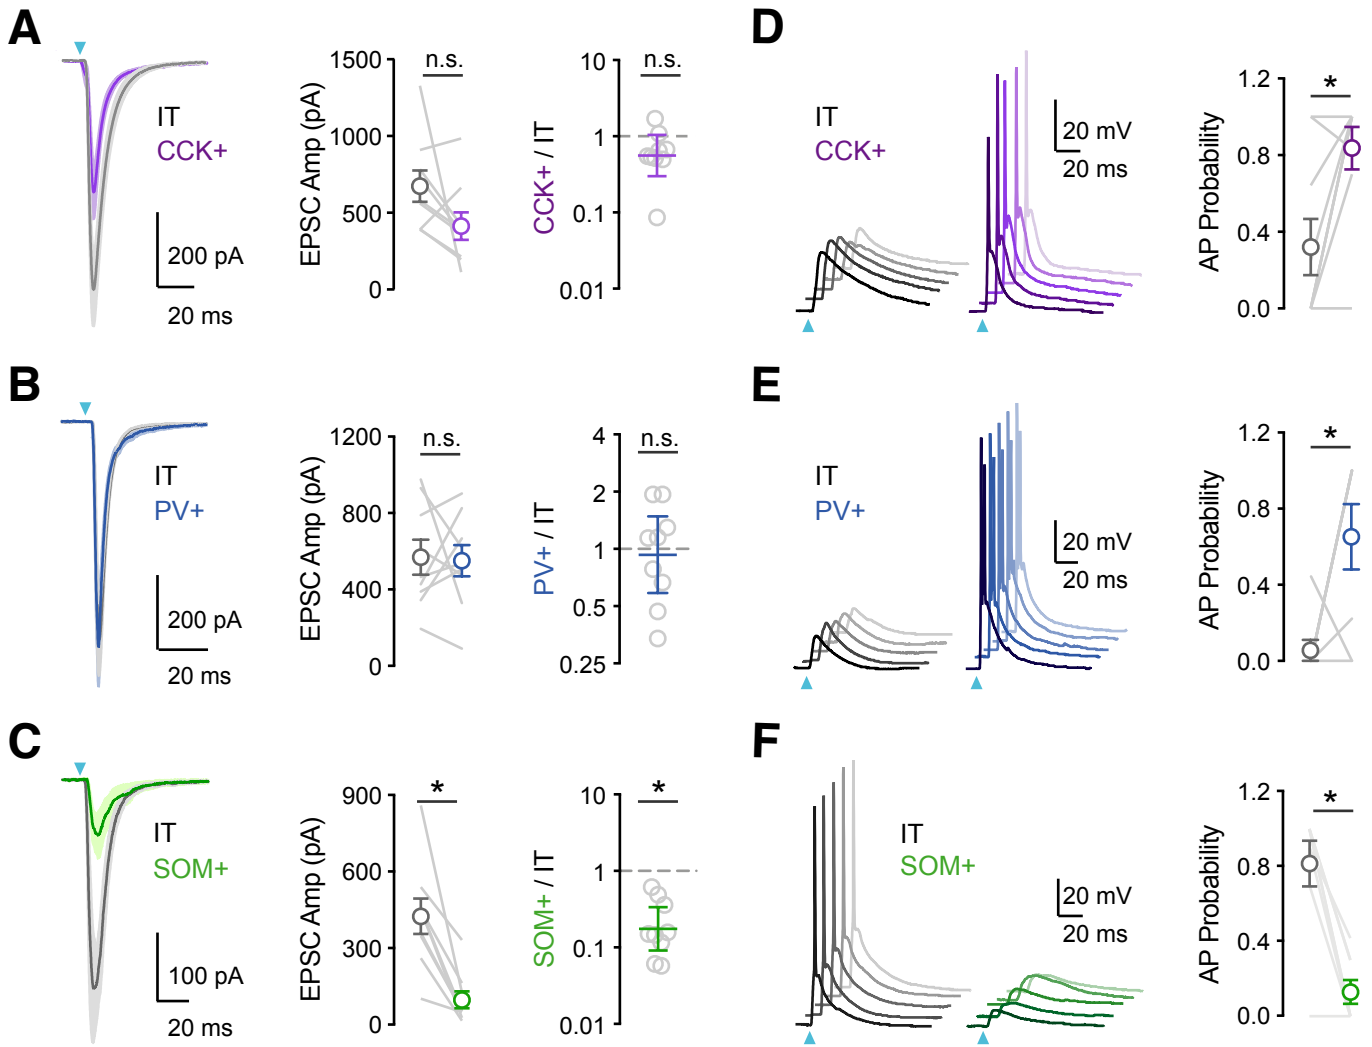



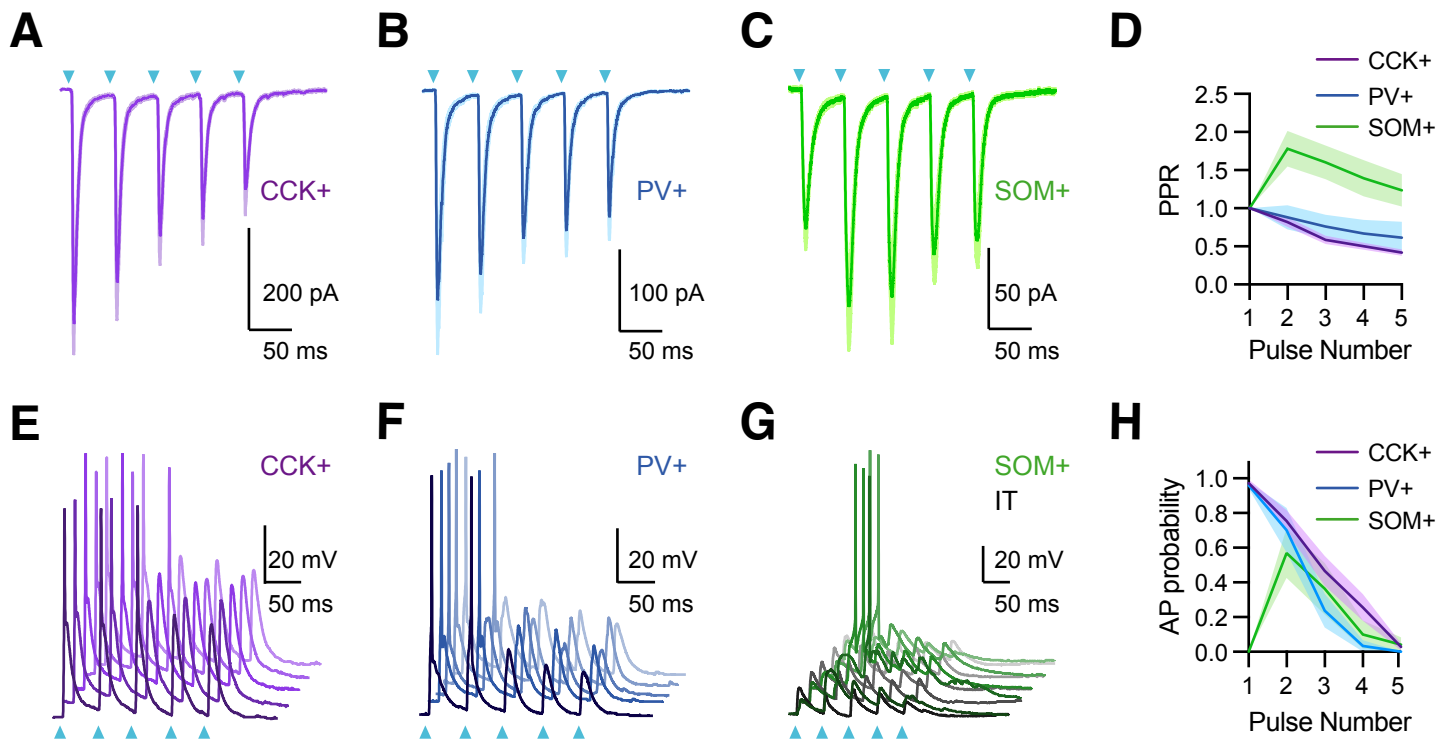

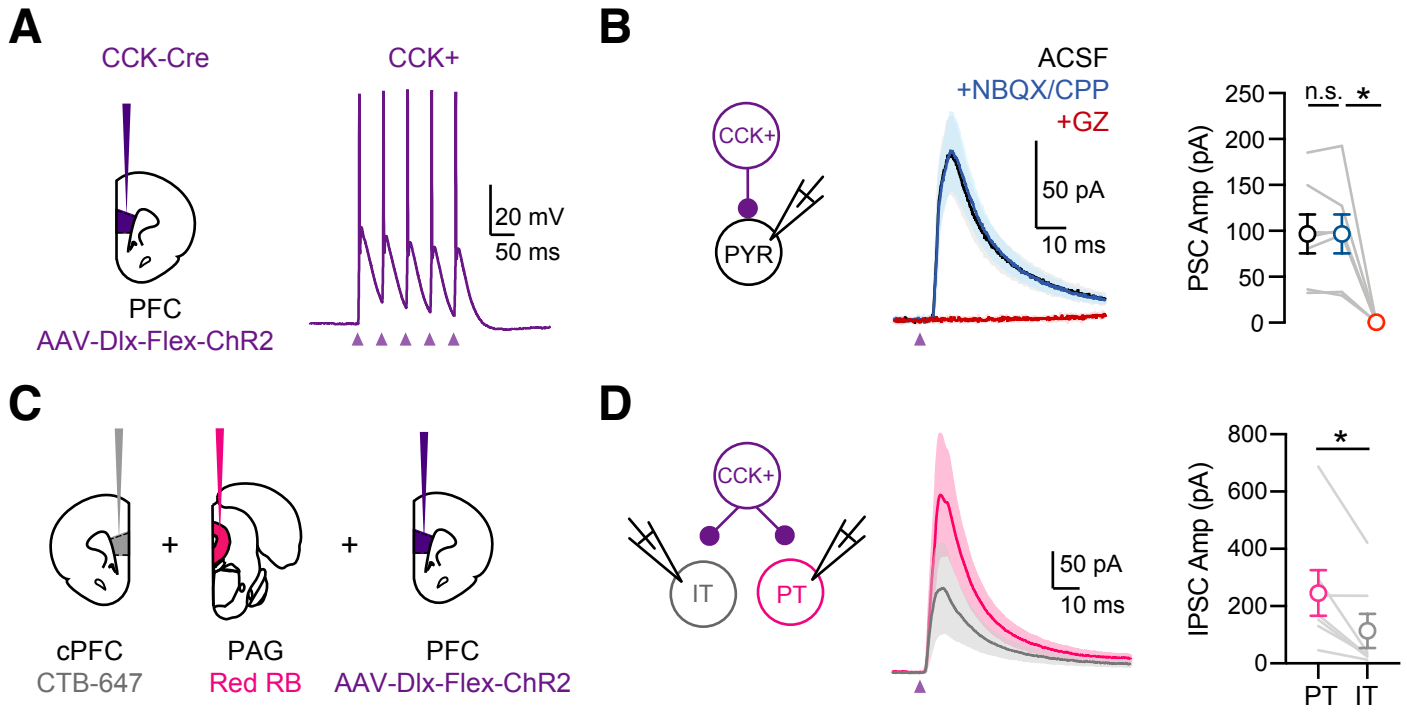

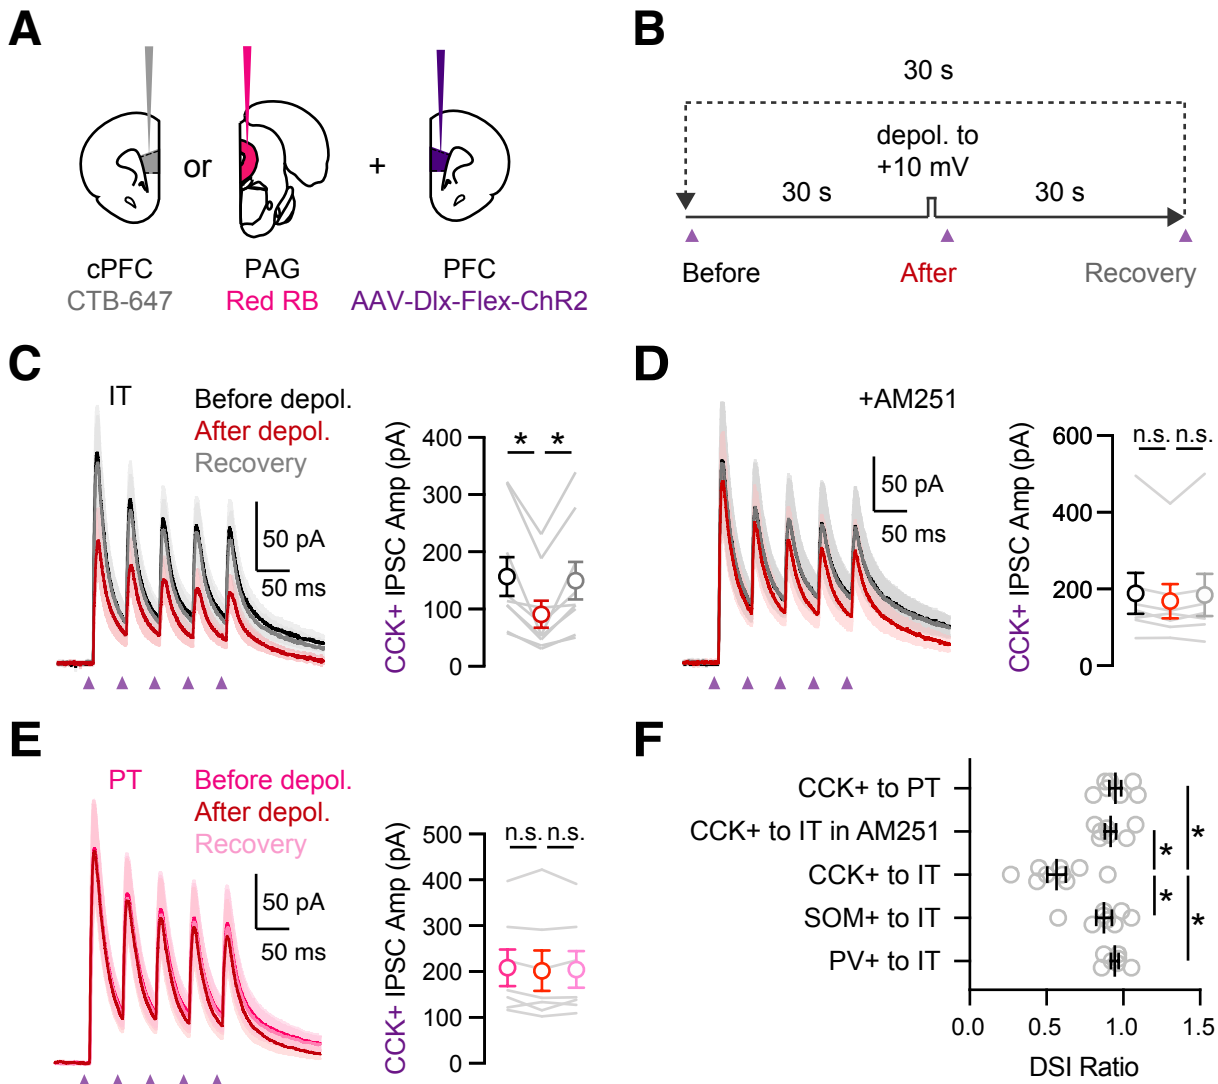

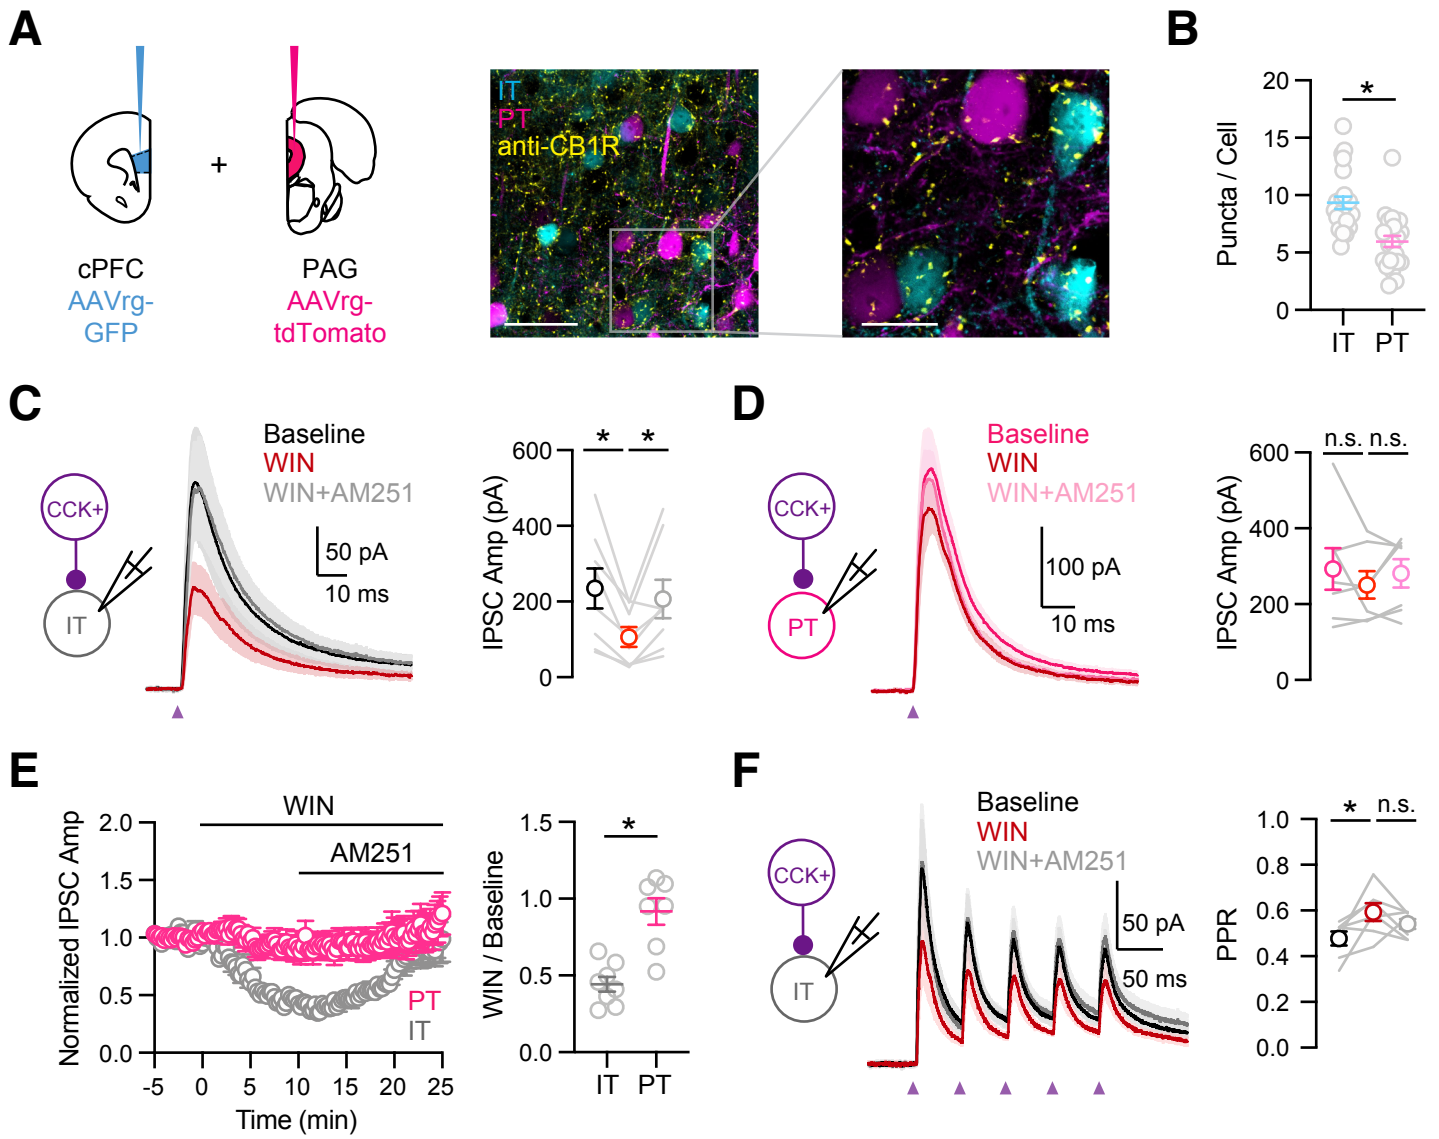

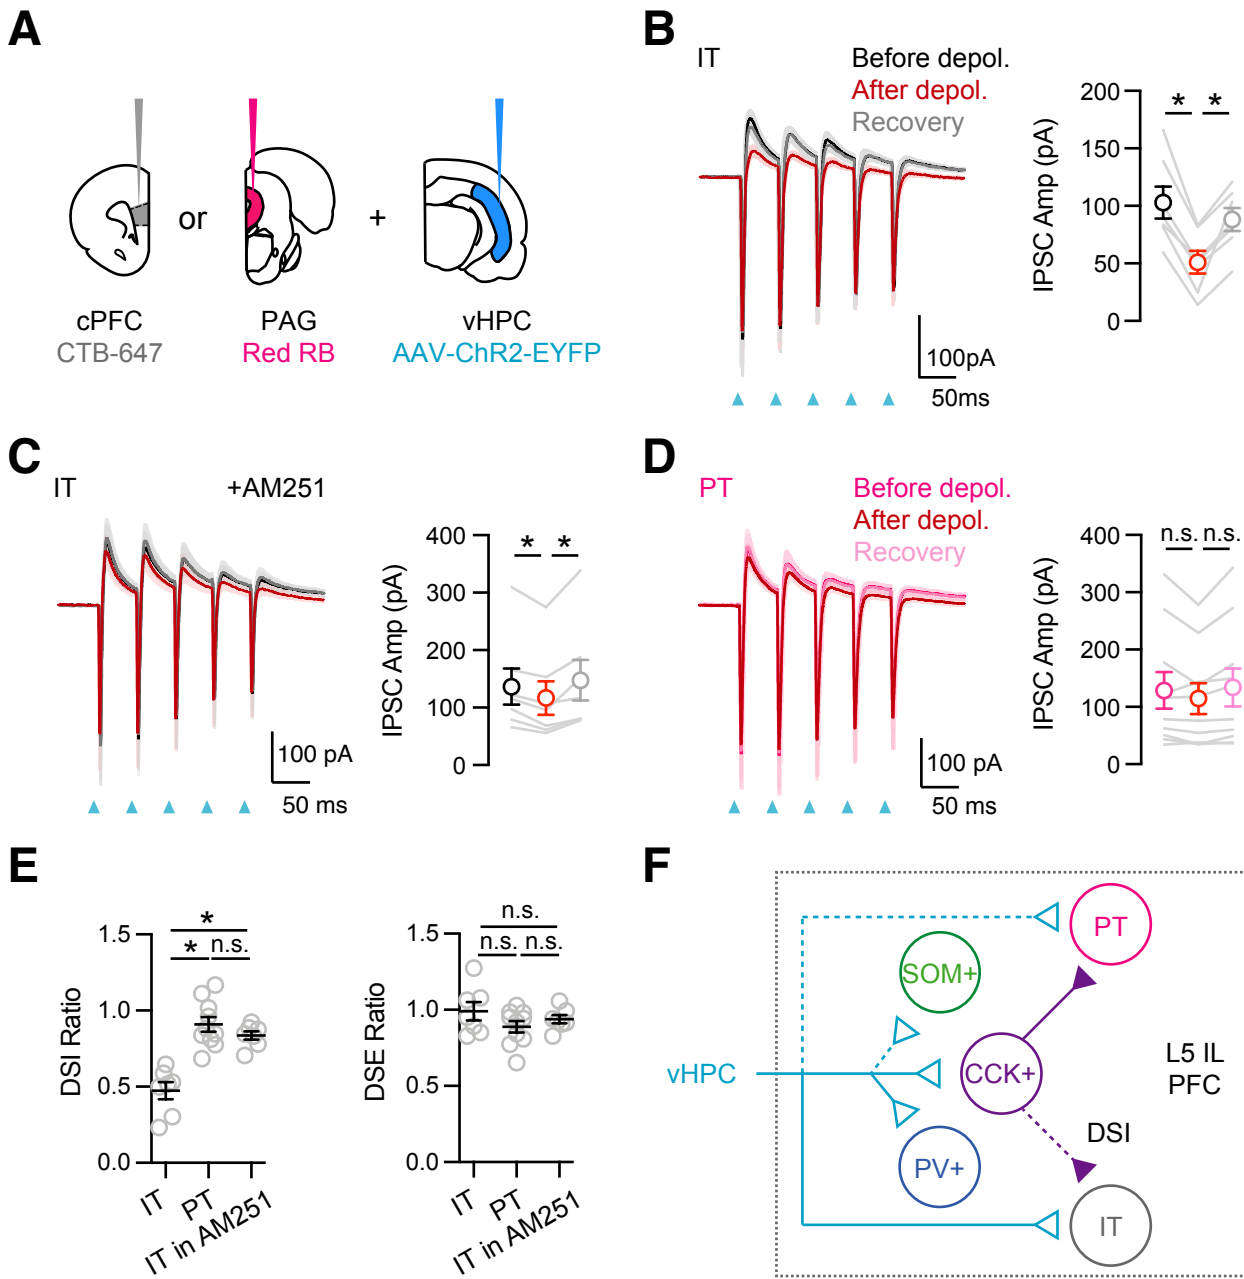

**A**

CCK-Cre x AAV-Dlx-Flex-GFP

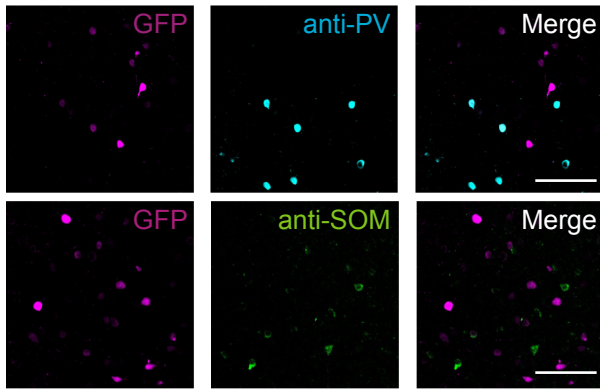

**B**

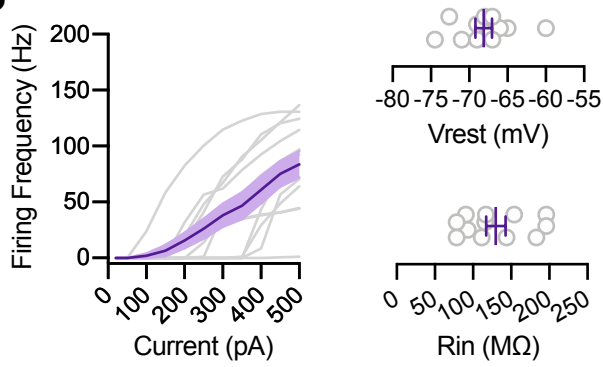

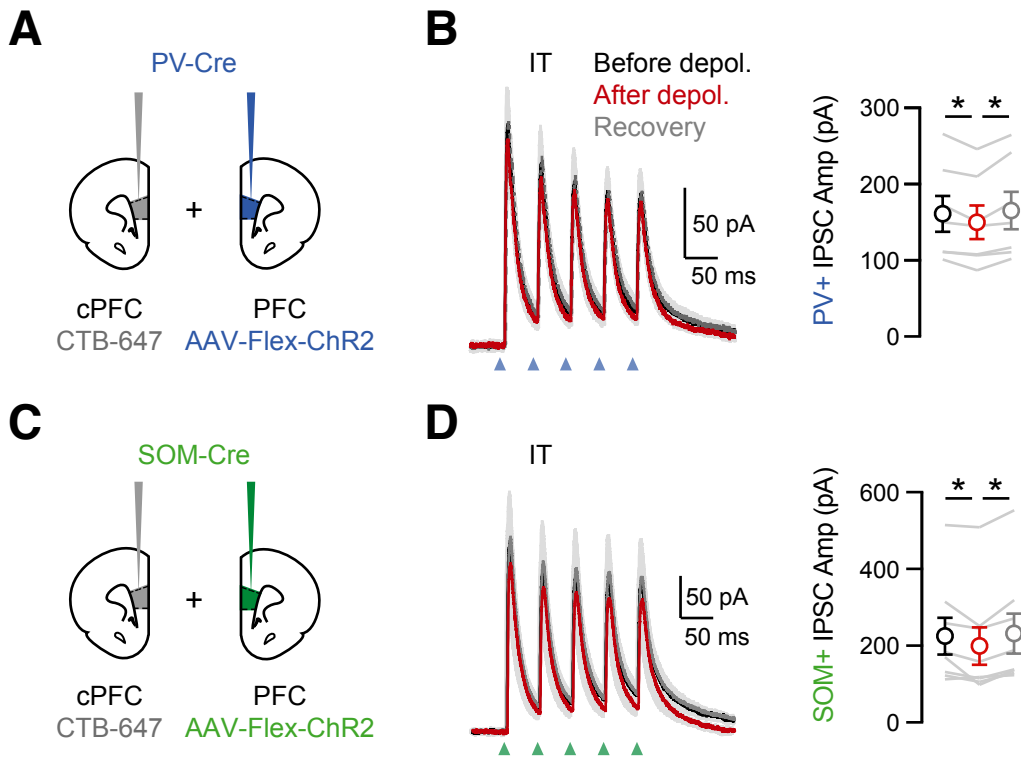

Source: https://www.biorxiv.org/content/10.1101/2020.03.12.988881v1.full.pdf
